# Supplementary material for: Ring-fused porphyrins: extension of π-conjugation significantly affects the aromaticity and optical properties of the porphyrin π-systems and the Lewis acidity of the central metal ions
Source: Royal Society of Chemistry journal article supplement (doi:10.1039/c5cp01420d), 2015-01-01
Supplement: c5cp01420d1.pdf [file c5cp01420d1.pdf]

Electronic Supplementary Information

for

Ring-fused porphyrins: extension of  $\pi$ -conjugation significantly affects  
the aromaticity and optical properties of the porphyrin  $\pi$ -systems and  
Lewis acidity of the central metal ions

*Yuta Saegusa,<sup>a</sup> Tomoya Ishizuka,<sup>\*a</sup> Keiyu Komamura,<sup>a</sup> Soji Shimizu,<sup>b</sup> Hiroaki Kotani,<sup>a</sup>  
Nagao Kobayashi,<sup>b</sup> and Takahiko Kojima<sup>\*a</sup>*

<sup>a</sup>*Department of Chemistry, Graduate School of Pure and Applied Sciences, University of Tsukuba, 1-1-1  
Tennoudai, Tsukuba, Ibaraki 305-8571, Japan*

<sup>b</sup>*Department of Chemistry, Graduate School of Science, Tohoku University, Sendai 980-8578, Japan*

## Experimental section

### Synthesis.

**A general procedure<sup>1</sup> of Pd-catalysed ring-fusing reactions Using Pd-nanoclusters<sup>2</sup> with  $[\text{Pd}(\eta^2\text{-C}_3\text{H}_5)\text{Cl}]_2$ .** A solution of TBA·OAc (TBA = tetra(*n*-butyl)ammonium, 627 mg, 2.08 mmol), allyl palladium(II) chloride dimer (3.53 mg, 9.65  $\mu\text{mol}$ ), and potassium carbonate (279 mg, 2.03 mmol) in 1,4-dioxane (1.0 mL) was heated at 110 °C for 3 min. After the colour of the solution changed to black, a tetrabromo-derivative of porphyrin (50  $\mu\text{mol}$ ) was quickly added to the solution. After stirring for 11 h, the reaction mixture was cooled to ambient temperature. The volatiles were removed under vacuum and the residual solid was washed with water. The solid was dissolved in pyridine and the precipitate including the palladium catalyst was filtered off. The filtrate was dried *in vacuo* to give black powder and the black powder was recrystallized from the THF solution in the presence of one drop of pyridine by depositing ethanol vapour as a poor solvent. The crystals obtained was filtered and washed with THF to give a red-purple filtrate. The remaining dark red solid mainly involved the quadruply-fused derivative and the further recrystallization by vapour deposition of ethanol to the THF solution in the presence of one drop of pyridine to give pure QFP derivative.

**Zinc(II) *trans*-doubly-fused porphyrinate (2-*trans*).** A solution of TBA·OAc (627 mg, 2.08 mmol), palladium acetate (4.81 mg, 21  $\mu\text{mol}$ ), triphenylphosphine (10.5 mg, 40  $\mu\text{mol}$ ), Molecular Sieves 4A (70 mg), potassium carbonate (280 mg, 2.03 mmol), and **12a** (50.2 mg, 51  $\mu\text{mol}$ ) in 1,4-dioxane (1.0 mL) was stirred at 110 °C for 16 h. The reaction mixture was cooled to ambient temperature, filtered, and washed with water. The red-brown powder was chromatographed on a silica gel column by using  $\text{CH}_2\text{Cl}_2$ /hexane (1:1, v/v) as an eluent to give ZnTPP (3.3 mg, 18  $\mu\text{mol}$ , 10%), **1** (8.7 mg, 13  $\mu\text{mol}$ , 25%), **2** (13 mg, 20  $\mu\text{mol}$ , 40%), and **3** (5.0 mg, 7.4  $\mu\text{mol}$ , 15%). **2**

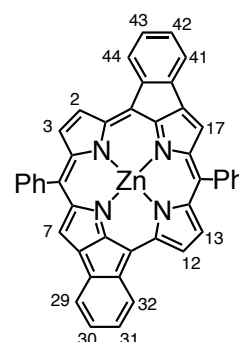

was a mixture of **2-cis** and **2-trans** and chromatographed on a GPC-HPLC by using  $\text{CHCl}_3$  as an eluent. The recrystallization from THF/ $\text{CH}_3\text{OH}$  gave light red powder of **2-cis** (6 mg, 9.2  $\mu\text{mol}$ ) and dark red powder of **2-trans** (4 mg, 4  $\mu\text{mol}$ ). m.p.: >300 °C.  $^1\text{H NMR}$  ( $\text{DMSO-}d_6$ ):  $\delta$  8.99 (d,  $J = 4.2$  Hz, 2H, 12-  $\beta$ -H), 8.17 (d,  $J = 4.2$  Hz, 2H, 13-  $\beta$ -H), 8.11 (d,  $J = 7.7$  Hz, 2H, 29,41-Ph-H), 8.00-7.90 (m, 4H, *o*-Ph-H), 7.75-7.66 (m, 6H, *m, p*-Ph-H), 7.56 (s, 2H, 7,17-  $\beta$ -H), 7.36 (d, 2H,  $J = 7.7$  Hz, 32,44-Ph-H), 7.02 (t,  $J = 7.7$  Hz, 2H, 30,42-Ph-H), 6.91 (t,  $J = 7.7$  Hz, 2H, 31,43-Ph-H). UV-vis (DMF):  $\lambda_{\text{max}}$  [nm] ( $\log(\epsilon, \text{M}^{-1} \text{cm}^{-1})$ ) = 432 (4.58), 489 (5.08), 522 (4.69), 643 (3.97), 721 (3.73), 799 (3.71), 895 (3.75). MS (MALDI-TOF, *dithranol* matrix):  $m/z = 674.1$  [ $\text{M}$ ] $^+$  (calcd. 674.1).

**Zinc(II) 24,30,36,42-tetrakis(*tert*-butyl)-quadruply-fused porphyrinate (5).** A ring-fusion reaction was performed utilizing **12b** (130.3 mg, 107  $\mu\text{mol}$ ) as a starting material to obtain **5**, using the aforementioned general procedure. After filtration, the precipitate obtained was chromatographed on a Bio-Beads S-X1 gel using THF as an eluent. The second fraction was collected and the solvent was removed *in vacuo*. The residual solid was recrystallized from THF/ethanol (1:3, v/v) and dried under vacuum to give **5** (69.0 mg, 77.1  $\mu\text{mol}$ , 72%). m.p.: >300 °C.  $^1\text{H NMR}$  ( $\text{DMSO-}d_6$ ):  $\delta$  7.89 (s,

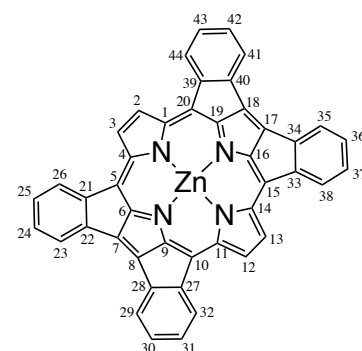

4H, 2, 3,12,13- $\beta$ -H), 7.20 (d,  $J = 8.0$  Hz, 4H, 26,32,38,44-Ph-H), 6.87 (s, 4H, 23,29,35,41-Ph-H), 6.74 (m, 4H, 25,31,37,43-Ph-H), 1.32 (s, 36H, *tert*-Bu-H). UV-vis (DMF):  $\lambda_{\max}$  [nm] ( $\log(\epsilon, \text{M}^{-1} \text{cm}^{-1})$ ) = 334 (4.49), 408 (4.52), 489 (4.34), 616 (4.81), 778 (3.72), 934 (3.38), 1060 (3.26). MS (MALDI-TOF, *dithranol matrix*):  $m/z = 892.4$  [ $\text{M}$ ]<sup>+</sup> (calcd. 892.4). Anal. Calcd for  $\text{C}_{60}\text{H}_{52}\text{N}_4\text{Zn}\cdot\text{H}_2\text{O}\cdot\text{pyridine}$ : C, 78.73; H, 6.00; N, 7.06. Found: C, 78.66; H, 5.82; N, 6.98.

**Zinc(II) 24,30,36,42-tetramethoxy-quadruply-fused porphyrinate (6).** A ring-fusion reaction using the above-mentioned general procedure was performed utilizing **12c** (59.7 mg, 53.6  $\mu\text{mol}$ ) as a starting material to obtain **6**. After filtration, the precipitate obtained was chromatographed on a Bio-Beads S-X1 gel using THF as an eluent. The second fraction was collected and the solvent was removed *in vacuo*. The residual solid was recrystallized from THF/ethanol (1:3, v/v) and dried under vacuum to give **6** (27.8 mg, 35.3  $\mu\text{mol}$ , 65%). m.p.: >300 °C. <sup>1</sup>H NMR (DMSO- $d_6$ ):  $\delta$  8.09 (s, 4H, 2, 3,12,13- $\beta$ -H), 7.41 (d,  $J = 7.4$  Hz, 4H, 26,32,38,44-Ph-H), 6.70 (s, 4H, 23,29,35,41-Ph-H), 6.37 (m, 4H, 25,31,37,43-Ph-H), 3.81 (s, 12H, methoxy-H). UV-vis (DMF):  $\lambda_{\max}$  [nm] ( $\log(\epsilon, \text{M}^{-1} \text{cm}^{-1})$ ) = 347 (4.52), 399 (4.34), 467 (4.59), 637 (4.71), 803 (3.66), 913 (3.26), 1026 (3.11), 1200 (2.99). MS (MALDI-TOF, *dithranol matrix*):  $m/z = 788.5$  [ $\text{M}$ ]<sup>+</sup> (calcd. 788.1). Anal. Calcd for  $\text{C}_{48}\text{H}_{28}\text{N}_4\text{O}_4\text{Zn}\cdot 0.5\text{H}_2\text{O}\cdot 0.25\text{THF}\cdot 0.5\text{CH}_2\text{Cl}_2$ : C, 69.16; H, 3.75; N, 6.52. Found: C, 68.99; H, 3.79; N, 6.29.

**Zinc(II) 24,30,36,42-tetra(methoxycarbonyl)-quadruply-fused porphyrinate (7).** A ring-fusion reaction using the general procedure mentioned above was performed utilizing **12d** (61.5 mg, 50.2  $\mu\text{mol}$ ) as a starting material to obtain **7**. After filtration, the collected solid was recrystallized from pyridine/ethanol (1:3, v/v) and dried under vacuum to give pure **7** (10.4 mg, 11.0  $\mu\text{mol}$ , 22%). m.p.: >300 °C. <sup>1</sup>H NMR (DMSO- $d_6$ ):  $\delta$  8.28 (s, 4H, 2, 3,12,13- $\beta$ -H), 7.74 (m, 4H, 26,32,38,44-Ph-H), 7.52-7.42 (m, 8H, 23,25,29,31,35,37,41,43-Ph-H). UV-vis (DMF):  $\lambda_{\max}$  [nm] ( $\log(\epsilon, \text{M}^{-1} \text{cm}^{-1})$ ) = 420 (4.40), 491 (4.23), 604 (4.50), 721 (3.91), 815 (3.61), 1028 (3.13). MS (MALDI-TOF, *dithranol matrix*):  $m/z = 1161.6$  [ $\text{M} + \text{dithranol} - 2\text{H} + \text{K}$ ]<sup>+</sup> (calcd. 1162.1). Anal. Calcd for  $\text{C}_{52}\text{H}_{28}\text{N}_4\text{O}_8\text{Zn}\cdot 3\text{H}_2\text{O}$ : C, 65.31; H, 3.58; N, 5.86. Found: C, 65.11; H, 3.68; N, 5.60.

**Zinc(II) 24,30,36,42-tetrakis(trifluoromethyl)-quadruply-fused porphyrinate (8).** A ring-fusion reaction using the aforementioned general procedure was performed utilizing **12e** (62.6 mg, 49.3  $\mu\text{mol}$ ) as a starting material to obtain **8**. After filtration, the remaining dark red solid mainly including **8** was recrystallized by vapour deposition of ethanol as a poor solvent to the THF solution in the presence of one drop of pyridine to give pure **8** (10.2 mg, 10.8  $\mu\text{mol}$ , 22%). m.p.: >300 °C. <sup>1</sup>H NMR (DMSO- $d_6$ ):  $\delta$  8.17 (s, 4H, 2,3,12,13- $\beta$ -H), 7.68 (d,  $J = 7.4$  Hz, 4H, 26,32,38,44-Ph-H), 7.25-7.15 (m, 8H, 23,25,29,31,35,37,41,43-Ph-H). UV-vis (DMF):  $\lambda_{\max}$  [nm] ( $\log(\epsilon, \text{M}^{-1} \text{cm}^{-1})$ ) = 320 (4.64), 403 (4.66), 497 (4.43), 598 (4.95), 793 (4.66), 929 (3.57), 1104 (3.18). MS (MALDI-TOF, *dithranol matrix*):  $m/z = 940.3$  [ $\text{M}$ ]<sup>+</sup> (calcd. 940.1). Anal. Calcd for  $\text{C}_{48}\text{H}_{16}\text{N}_4\text{F}_{12}\text{Zn}\cdot\text{H}_2\text{O}\cdot\text{C}_2\text{H}_5\text{OH}$ : C, 59.69; H, 2.40; N, 5.57. Found: C, 59.82; H, 2.46; N, 5.55.

**24,30,36,42-tetramesityl-quadruply-fused porphyrin (9).** A ring-fusion reaction according to the general procedure mentioned above was performed utilizing **12f** (73 mg, 50  $\mu\text{mol}$ ) as a starting material to obtain **9**. After filtration, the precipitate obtained was chromatographed on a Bio-Beads S-X1 gel using THF as an eluent. The second moving fraction was collected and the solvent was removed *in vacuo*. The residual solid was recrystallized from THF/ethanol (1:3, v/v) and

**Scheme S1.**

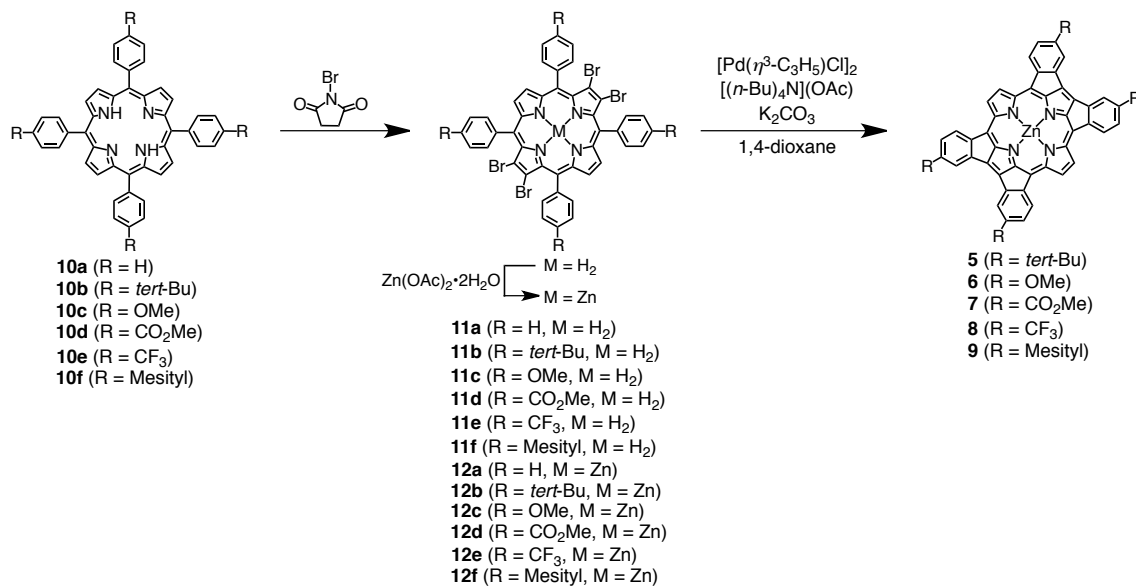

dried under vacuum to give pure **9** (42 mg, 37  $\mu$ mol, 74%). m.p.: >300 °C. <sup>1</sup>H NMR (DMSO-*d*<sub>6</sub>):  $\delta$  8.35 (s, 4H, 2, 3,12,13- $\beta$ -H), 7.71 (d,  $J$  = 7.6 Hz, 4H, 26,32,38,44-Ph-H), 6.95 (s, 4H, 23,29,35,41-Ph-H), 6.90 (s, 8H, *m*-mesityl-H), 6.54 (d,  $J$  = 7.6 Hz, 4H, 25,31,37,43-Ph-H), 2.23 (s, 12H, mesityl-*p*-CH<sub>3</sub>), 2.11 (s, 24H, mesityl-*o*-CH<sub>3</sub>). UV-vis (THF):  $\lambda_{\text{max}}$  [nm] (log ( $\epsilon$ , M<sup>-1</sup> cm<sup>-1</sup>)) = 320 (4.61), 412 (4.65), 437 (4.62), 598 (4.98), 616 (4.97), 775 (3.80), 918 (3.38), 1046 (3.15). MS (MALDI-TOF, dithranol matrix):  $m/z$  = 1140.4 [M]<sup>+</sup> (calcd. 1140.8). Anal. Calcd for C<sub>80</sub>H<sub>60</sub>N<sub>4</sub>Zn·5H<sub>2</sub>O·CH<sub>2</sub>Cl<sub>2</sub>: C, 73.83; H, 5.51; N, 4.25. Found: C, 73.64; H, 5.70; N, 3.98.

**5,10,15,20-Tetraphenylporphyrin (10a)**. This compound was synthesized according to the literature procedure<sup>3</sup> to yield a purple solid of **10a** (787 mg, 1.3 mmol, 19%). <sup>1</sup>H NMR (CDCl<sub>3</sub>):  $\delta$  8.84 (s, 8H,  $\beta$ -H), 8.22 (dd,  $J$  = 8.0, 1.6 Hz, 4H, *o*-phenyl-H), 7.72-7.78 (m, 12H, *m*, *p*-phenyl-H), -2.77 (br s, 2H, inner NH). UV-vis (CHCl<sub>3</sub>):  $\lambda_{\text{max}}$  [nm] = 647, 591, 550, 512, 418. Fluorescence ( $\lambda_{\text{ex}}$  = 418 nm, CHCl<sub>3</sub>):  $\lambda_{\text{max}}$  [nm] = 714, 649. MS (MALDI-TOF, dithranol matrix):  $m/z$  = 613.9 [M]<sup>+</sup> (calcd. 614.3).

**5,10,15,20-Tetrakis(4-*tert*-butylphenyl)porphyrin (10b)**.<sup>4</sup> A condensation of pyrrole (2.79 mL, 40.2 mmol) and 4-*tert*-butylbenzaldehyde (6.72 mL, 40.1 mmol) was performed with a similar procedure of **10a** to obtain **10b** (2.03 g, 2.4 mmol, 24%). <sup>1</sup>H NMR (CDCl<sub>3</sub>):  $\delta$  8.97 (s, 8H,  $\beta$ -H), 8.15 (d,  $J$  = 8.3 Hz, 4H, *o*-phenyl-H), 7.76 (d,  $J$  = 8.3 Hz, 4H, *m*-phenyl-H), -2.77 (br s, 2H, inner NH). UV-vis (CHCl<sub>3</sub>):  $\lambda_{\text{max}}$  [nm] = 648, 592, 554, 518, 421. MS (MALDI-TOF, dithranol matrix):  $m/z$  = 841.1 [M]<sup>+</sup> (calcd. 841.5).

**5,10,15,20-Tetrakis(4-methoxyphenyl)porphyrin (10c)**.<sup>5,6</sup> A condensation of pyrrole (2.78 mL, 40.2 mmol) and 4-methoxyphenylbenzaldehyde (4.88 mL, 40.2 mmol) was performed with a similar procedure of **10a** to obtain **10c** (1.38 g, 1.9 mmol, 19%). <sup>1</sup>H NMR (CDCl<sub>3</sub>):  $\delta$  8.86 (s, 8H,  $\beta$ -H), 8.12 (d,  $J$  = 8.6 Hz, 4H, *o*-phenyl-H), 7.29 (d,  $J$  = 8.6 Hz, 8H, *m*-phenyl-H), 4.10 (s, 12H, methoxy-H), -2.74 (br s, 2H, inner NH). UV-vis (CHCl<sub>3</sub>):  $\lambda_{\text{max}}$  [nm] = 651, 594, 556, 520, 422. MS (MALDI-TOF, dithranol matrix):  $m/z$  = 798.3 [M]<sup>+</sup> (calcd. 798.2).

**5,10,15,20-Tetrakis(4-methoxycarbonylphenyl)porphyrin (10d).**<sup>6</sup> A condensation of pyrrole (2.79 g, 40.2 mmol) and 4-methoxycarbonylbenzaldehyde (6.62 g, 40.2 mmol) was performed with a similar procedure of **10a** to obtain **10d** (2.35 g, 2.8 mmol, 28%). <sup>1</sup>H NMR (CDCl<sub>3</sub>): δ 8.82 (s, 8H, β-H), 8.45 (d, *J* = 6.5 Hz, 8H, *o*-phenyl-H), 8.30 (d, *J* = 6.5 Hz, 8H, *m*-phenyl-H), 4.12 (s, 12H, CO<sub>2</sub>CH<sub>3</sub>), -2.81 (br s, 2H, inner NH). UV-vis (CHCl<sub>3</sub>): λ<sub>max</sub> [nm] = 648, 589, 550, 517, 421. MS (MALDI-TOF, dithranol matrix): *m/z* = 846.1 [M]<sup>+</sup> (calcd. 846.3).

**5,10,15,20-Tetrakis(4-trifluoromethylphenyl)porphyrin (10e).**<sup>7</sup> A condensation of pyrrole (2.09 mL, 30.2 mmol) and 4-trifluoromethylbenzaldehyde (4.05 mL, 30.2 mmol) was performed with a similar procedure of **10a** to obtain **10e** (1.06 g, 1.20 mmol, 16%). <sup>1</sup>H NMR (CDCl<sub>3</sub>): δ 8.81 (s, 8H, β-H), 8.34 (d, *J* = 8.0 Hz, 4H, *o*-phenyl-H), 8.05 (d, *J* = 8.0 Hz, 8H, *m*-phenyl-H), -2.84 (br s, 2H, inner NH). UV-vis (CHCl<sub>3</sub>): λ<sub>max</sub> [nm] = 645, 589, 548, 513, 418. MS (MALDI-TOF, dithranol matrix): *m/z* = 885.7 [M]<sup>+</sup> (calcd. 885.2).

**Scheme S2.**

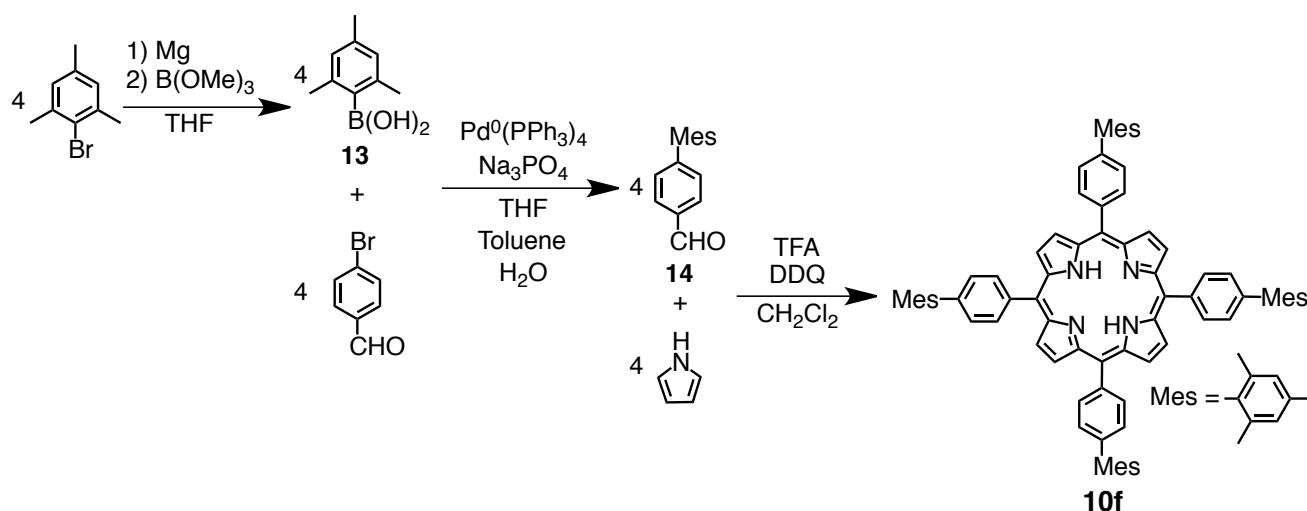

**5,10,15,20-Tetrakis(4-mesitylphenyl)porphyrin (10f).**<sup>8</sup> To the solution of **14** (3.15 g, 15 mmol) in CH<sub>2</sub>Cl<sub>2</sub> (1.5 L) was added pyrrole (1.04 mL, 15 mmol), and subsequently, trifluoroacetic acid (2.24 mL, 30 mmol), and the reaction mixture was stirred at room temperature for 3 h. To the resultant solution, was added DDQ (= 2,3-dichloro-5,6-dicyanobenzoquinone) (1.71 g, 7.5 mmol) and the reaction mixture was further stirred at room temperature for 1 h. The reaction mixture was poured onto an alumina pad and eluted with CH<sub>2</sub>Cl<sub>2</sub> until the eluting solution became pale brown. The solvent was removed under vacuum to give a purple solid. The resulting purple powder was chromatographed on a silica gel column by using CH<sub>2</sub>Cl<sub>2</sub>/hexane (3:4, v/v) as an eluent. The red purple fraction was collected and the solvent was removed *in vacuo*. The residual solid was recrystallized from CH<sub>2</sub>Cl<sub>2</sub>/CH<sub>3</sub>OH (1:3, v/v) and dried under vacuum to yield **10f** (843 mg, 0.77 mmol, 21%). <sup>1</sup>H NMR (CDCl<sub>3</sub>): δ 8.99 (s, 8H, β-H), 8.30 (dd, *J* = 6.3, 1.9 Hz, 4H, *o*-phenyl-H), 7.54 (dd, *J* = 6.3, 1.9 Hz, 8H, *m*, *p*-phenyl-H), 7.12 (s, 8H, *m*-mesityl-H), 2.44 (s, 12H, mesityl-*p*-CH<sub>3</sub>), 2.36 (s, 24H, mesityl-*o*-CH<sub>3</sub>), -2.65 (br s, 2H, inner

NH). UV-vis (CHCl<sub>3</sub>):  $\lambda_{\max}$  [nm] = 648, 593, 553, 518, 421. MS (MALDI-TOF, dithranol matrix):  $m/z$  = 1150.85 [M]<sup>+</sup> (calcd. 1150.84).

**2,3,12,13-Tetrabromo-5,10,15,20-tetraphenylporphyrin (11a).**<sup>9,10</sup> To a solution of **10a** (303.2 mg, 0.49 mmol) in CHCl<sub>3</sub> (60 mL) was added recrystallized *N*-bromosuccinimide (NBS) (532 mg, 2.99 mmol) and the reaction mixture was refluxed for 4 h. After cooling to room temperature, the reaction mixture was washed with water to remove any soluble succinimide impurities. The brown-coloured solid was chromatographed on a silica gel column using CHCl<sub>3</sub>/hexane (1:3, v/v) as an eluent. The first moving fraction was collected and the solvent was removed *in vacuo*. The residual solid was recrystallized from CH<sub>2</sub>Cl<sub>2</sub>/CH<sub>3</sub>OH (1:3, v/v) and dried under vacuum to yield **11a** (280 mg, 0.30 mmol, 61%). <sup>1</sup>H NMR (CDCl<sub>3</sub>):  $\delta$  8.70 (s, 4H,  $\beta$ -H), 8.17 (d,  $J$  = 8.0 Hz, 8H, *o*-phenyl-H), 7.75-7.81 (m, 12H, *m*, *p*-phenyl-H), -2.82 (br s, 2H, inner NH). UV-vis (CHCl<sub>3</sub>):  $\lambda_{\max}$  [nm] = 684, 536, 438. MS (MALDI-TOF, dithranol matrix):  $m/z$  = 927.1 [M + H]<sup>+</sup> (calcd. 926.9).

**2,3,12,13-Tetrabromo-5,10,15,20-tetrakis(4-*tert*-butylphenyl)porphyrin (11b).**<sup>11</sup> A bromination reaction was performed utilizing **10b** (1.00 g, 1.19 mmol) as a starting material and NBS (1.74 g, 9.76 mmol) to obtain **11b** (758 mg, 0.65 mmol, 55%) with a method as described in the synthesis of **11a**. <sup>1</sup>H NMR (CDCl<sub>3</sub>):  $\delta$  8.84 (s, 8H,  $\beta$ -H), 8.22 (dd,  $J$  = 8.0, 1.6 Hz, 4H, *o*-phenyl-H), 7.72-7.78 (m, 12H, *m*, *p*-phenyl-H), -2.77 (br s, 2H, inner NH). UV-vis (CHCl<sub>3</sub>):  $\lambda_{\max}$  [nm] = 699, 543, 444. MS (MALDI-TOF, dithranol matrix):  $m/z$  = 1154.7 [M + 4H]<sup>+</sup> (calcd. 1154.2).

**2,3,12,13-Tetrabromo-5,10,15,20-tetrakis(4-methoxyphenyl)porphyrin (11c).**<sup>11</sup> A bromination reaction with a similar procedure of **11a** was performed utilizing **10c** (507 mg, 0.68 mmol) and NBS (564 mg, 3.26  $\mu$ mol) as starting materials to obtain **11c** (544 mg, 0.52 mmol, 76%). <sup>1</sup>H NMR (CDCl<sub>3</sub>):  $\delta$  8.69 (s, 4H,  $\beta$ -H), 8.10 (d,  $J$  = 8.6 Hz, 4H, *o*-phenyl-H), 7.32 (d,  $J$  = 8.6 Hz, 8H, *m*-phenyl-H), 4.10 (s, 12H, methoxy-H), -2.71 (br s, 2H, inner NH). UV-vis (CHCl<sub>3</sub>):  $\lambda_{\max}$  [nm] = 699, 590, 543, 446. MS (MALDI-TOF, dithranol matrix):  $m/z$  = 1051.2 [M + H]<sup>+</sup> (calcd. 1050.9).

**2,3,12,13-Tetrabromo-5,10,15,20-tetrakis(4-methoxycarbonylphenyl)porphyrin (11d).**<sup>11</sup> A bromination reaction with a similar procedure of **11a** was performed utilizing **10d** (600 mg, 0.71 mmol) as a starting material in 1,2-dichloroethane (150 mL) to obtain **11d**. After washing with H<sub>2</sub>O and removal of the solvent, the reaction mixture was chromatographed on a silica gel column by using CH<sub>2</sub>Cl<sub>2</sub>/CH<sub>3</sub>OH/Et<sub>3</sub>N (100:3:0.5, v/v/v) as an eluent. The second moving fraction was collected and the solvent was removed *in vacuo*. The residual solid was recrystallized from CH<sub>2</sub>Cl<sub>2</sub>/CH<sub>3</sub>OH (1:3, v/v) and the crystalline solid obtained was dried under vacuum to yield **11d** (389 mg, 0.33 mmol, 47%). <sup>1</sup>H NMR (CDCl<sub>3</sub>):  $\delta$  8.65 (s, 4H,  $\beta$ -H), 8.46 (d,  $J$  = 8.0 Hz, 8H, *o*-phenyl-H), 8.25 (d,  $J$  = 8.0 Hz, 8H, *m*-phenyl-H), 4.11 (s, 12H, CO<sub>2</sub>CH<sub>3</sub>), -2.85 (br s, 2H, inner NH). UV-vis (CHCl<sub>3</sub>):  $\lambda_{\max}$  [nm] = 681, 615, 535, 439. MS (MALDI-TOF, dithranol matrix):  $m/z$  = 1162.9 [M]<sup>+</sup> (calcd. 1162.9).

**2,3,12,13-Tetrabromo-5,10,15,20-tetrakis(4-mesitylphenyl)porphyrin (11f).** A bromination reaction with a similar procedure of **11d** was performed utilizing **10f** (426 mg, 0.39 mmol) as a starting material to obtain **11f** (374 mg, 0.27 mmol, 69%). <sup>1</sup>H NMR (CDCl<sub>3</sub>):  $\delta$  8.87 (s, 4H,  $\beta$ -H), 8.26 (d,  $J$  = 8.0 Hz, 4H, *o*-phenyl-H), 7.57 (d,  $J$  = 8.0 Hz, 8H, *m*-phenyl-H), 7.11 (s, 8H, *m*-mesityl-H), 2.43 (s, 12H, mesityl-*p*-CH<sub>3</sub>), 2.33 (s, 24H, mesityl-*o*-CH<sub>3</sub>), -2.70 (br s, 2H, inner NH). UV-vis (CHCl<sub>3</sub>):  $\lambda_{\max}$  [nm] = 690, 539, 442. MS (MALDI-TOF, dithranol matrix):  $m/z$  = 1403.2 [M + H]<sup>+</sup> (calcd. 1403.2).

**Zinc(II) 2,3,12,13-tetrabromo-5,10,15,20-tetraphenylporphyrinate (12a).**<sup>11,12</sup> To a solution of **11a** (260 mg, 0.262 mmol) in CHCl<sub>3</sub> (50 mL), was added a suspension of Zn(OAc)<sub>2</sub>·2H<sub>2</sub>O (311 mg, 1.42 mmol) in CH<sub>3</sub>OH (20 mL) and the reaction mixture was refluxed for 5 h. The reaction mixture was poured into water and the organic phase was separated and then dried over Na<sub>2</sub>SO<sub>4</sub>. After removing the solvent, the resulting red purple powder was chromatographed on a silica gel column by using CHCl<sub>3</sub>/hexane (3:1, v/v) as an eluent. The second moving fraction was collected and the solvent was removed *in vacuo*. The residual solid was recrystallized from CH<sub>2</sub>Cl<sub>2</sub>/hexane (1:3, v/v) and the crystalline solid obtained was dried under vacuum to yield **12a** (217 mg, 0.22 mmol, 83%). <sup>1</sup>H NMR (CDCl<sub>3</sub>): δ 8.65 (s, 4H, β-H), 8.02 (d, *J* = 8.0 Hz, 8H, *o*-phenyl-H), 7.66-7.77 (m, 12H, *m*, *p*-phenyl-H). UV-vis (CHCl<sub>3</sub>): λ<sub>max</sub> [nm] = 597, 557, 431. MS (MALDI-TOF, dithranol matrix): *m/z* = 988.3 [M + H]<sup>+</sup> (calcd. 988.8).

**Zinc(II) 2,3,12,13-tetrabromo-5,10,15,20-tetrakis(4-*tert*-butylphenyl)porphyrinate (12b).**<sup>13</sup> Metalation of **11b** with a similar procedure of **12a** was performed utilizing **11b** (385 mg, 0.33 mmol) and Zn(OAc)<sub>2</sub>·2H<sub>2</sub>O (362 mg, 1.65 mmol) as starting materials to obtain **12b** (310 mg, 0.25 mmol, 76%). <sup>1</sup>H NMR (CDCl<sub>3</sub>): δ 8.65 (s, 4H, β-H), 8.02 (d, *J* = 8.0 Hz, 8H, *o*-phenyl-H), 7.66-7.77 (m, 12H, *m*, *p*-phenyl-H). UV-vis (CHCl<sub>3</sub>): λ<sub>max</sub> [nm] = 611, 598, 437. MS (MALDI-TOF, dithranol matrix): *m/z* = 1221.7 [M + 3H]<sup>+</sup> (calcd. 1221.2).

**Zinc(II) 2,3,12,13-tetrabromo-5,10,15,20-tetrakis(4-methoxyphenyl)porphyrinate (12c).** Metalation of **11c** with a similar procedure of **12a** was performed utilizing **11c** (396 mg, 0.38 mmol) and Zn(OAc)<sub>2</sub>·2H<sub>2</sub>O (417 mg, 1.9 mmol) as starting materials to obtain **12c** (378 mg, 0.34 mmol, 89%). <sup>1</sup>H NMR (CDCl<sub>3</sub>): δ 8.57 (s, 4H, β-H), 7.92 (d, *J* = 8.2 Hz, 8H, *o*-phenyl-H), 7.23 (d, *J* = 8.2 Hz, 8H, *m*-phenyl-H), 4.07 (s, 12H, OCH<sub>3</sub>). UV-vis (CHCl<sub>3</sub>): λ<sub>max</sub> [nm] = 613, 568, 439. MS (MALDI-TOF, dithranol matrix): *m/z* = 1114.9 [M + H]<sup>+</sup> (calcd. 1114.8).

**Zinc(II) 2,3,12,13-tetrabromo-5,10,15,20-tetrakis(4-methoxycarbonylphenyl)porphyrinate (12d).**<sup>13</sup> Metalation of **11d** with a similar procedure of **12a** was performed utilizing **11d** (352 mg, 0.30 mmol) and Zn(OAc)<sub>2</sub>·2H<sub>2</sub>O (329 mg, 1.5 mmol) as starting materials to obtain **12d** (217 mg, 0.18 mmol, 68%). <sup>1</sup>H NMR (CDCl<sub>3</sub>): δ 8.57 (s, 4H, β-H), 8.36 (d, *J* = 7.9 Hz, 8H, *o*-phenyl-H), 8.11 (d, *J* = 7.9 Hz, 8H, *m*-phenyl-H), 4.08 (s, 12H, CO<sub>2</sub>CH<sub>3</sub>). UV-vis (CHCl<sub>3</sub>): λ<sub>max</sub> [nm] = 681, 567, 436. MS (MALDI-TOF, dithranol matrix): *m/z* = 1227.6 [M + H]<sup>+</sup> (calcd. 1226.8).

**Zinc(II) 2,3,12,13-tetrabromo-5,10,15,20-tetrakis(4-trifluoromethylphenyl)porphyrinate (12e).** To a solution of **10e** (203 mg, 0.23 mmol) in 1,2-dichloroethane (50 mL) was added recrystallized NBS (234 mg, 1.35 mmol) and the reaction mixture was refluxed for 24 h. The solvent was removed *in vacuo*, and the residual solid was washed with H<sub>2</sub>O and dried under vacuum to obtain crude **11e**. To the solution of crude **11e** (273 mg, 0.23 mmol) in CHCl<sub>3</sub> (45 mL) was added a suspension of Zn(OAc)<sub>2</sub>·2H<sub>2</sub>O (359 mg, 1.1 mmol) in CH<sub>3</sub>OH (16 mL) and the reaction mixture was refluxed for 3 h. The reaction mixture was poured into water and the organic phase was separated and then dried over Na<sub>2</sub>SO<sub>4</sub>. After removing the solvent, the resulting red purple powder was chromatographed on a silica gel column by using CHCl<sub>3</sub>/hexane (2:1, v/v) as an eluent. The second moving fraction was collected and the solvent was removed *in vacuo*. The residual solid was recrystallized from CH<sub>2</sub>Cl<sub>2</sub>/hexane (1:3, v/v) and dried under vacuum to yield **12e** (85 mg, 67 μmol, 30% (2 step)). <sup>1</sup>H NMR (CDCl<sub>3</sub>): δ 8.65 (s, 4H, β-H), 8.02 (d, *J* = 8.0 Hz, 8H, *o*-phenyl-H), 7.66-7.77 (m, 12H, *m*, *p*-phenyl-H). UV-vis

(CHCl<sub>3</sub>):  $\lambda_{\max}$  [nm] = 605, 565, 434. MS (MALDI-TOF, dithranol matrix, negative mode):  $m/z$  = 1226.8 [M + H]<sup>-</sup> (calcd. 1226.7).

**Zinc(II) 2,3,12,13-tetrabromo-5,10,15,20-tetrakis(4-mesitylphenyl)porphyrinate (12f).** Metalation of **11f** with a similar procedure of **12a** was performed utilizing **11f** (301 mg, 0.21 mmol) and Zn(OAc)<sub>2</sub>·2H<sub>2</sub>O (230 mg, 1.1 mmol) as starting materials to obtain **12f** (297 mg, 0.20 mmol, 95%). <sup>1</sup>H NMR (CDCl<sub>3</sub>):  $\delta$  8.95 (s, 4H,  $\beta$ -H), 8.13 (d,  $J$  = 7.8 Hz, 4H, *o*-phenyl-H), 7.51 (d,  $J$  = 7.8 Hz, 8H, *m*-phenyl-H), 7.11 (s, 8H, *m*-mesityl-H), 2.43 (s, 12H, mesityl-*p*-CH<sub>3</sub>), 2.35 (s, 24H, mesityl-*o*-CH<sub>3</sub>). UV-vis (CHCl<sub>3</sub>):  $\lambda_{\max}$  [nm] = 610, 568, 437. MS (MALDI-TOF, dithranol matrix):  $m/z$  = 1466.6 [M + 2H]<sup>+</sup> (calcd. 1466.2).

**2,4,6-Trimethylphenylboronic acid (13).** This compound was synthesized according to the literature procedure.<sup>14</sup> <sup>1</sup>H NMR (DMSO-*d*<sub>6</sub>):  $\delta$  8.05 (s, 2H, OH-H), 6.73 (s, 2H, *m*-mesityl-H), 2.22 (s, 6H, mesityl-*o*-CH<sub>3</sub>), 2.19 (s, 3H, mesityl-*p*-CH<sub>3</sub>).

**Mesityl-benzaldehyde (14).** This compound was synthesized according to a similar procedure.<sup>15</sup> Into a 500 mL three-necked flask equipped with a teflon magnetic stirring bar were charged **7** (10.1 g, 61.6 mmol), 4-bromobenzaldehyde (6.75 g, 36.5 mmol), Na<sub>3</sub>PO<sub>4</sub> (25 g, 153 mmol) and Pd(PPh<sub>3</sub>)<sub>4</sub> (624 mg, 0.546 mmol). Then, THF (100 mL), toluene (100 mL) and H<sub>2</sub>O (32 mL) were added and the reaction mixture was refluxed for 8 d. The solvent was removed to give a white solid and the residual solid was dissolved in EtOAc. The reaction mixture was washed with water and dried over Na<sub>2</sub>SO<sub>4</sub>, and the solvent was evaporated. The white solid obtained was chromatographed on a silica gel column using EtOAc/hexane (1:6, v/v) as an eluent. The second moving fraction was collected and the solvent was removed *in vacuo* to yield **8** (8.04 g, 35.8 mmol, 98%). <sup>1</sup>H NMR (CDCl<sub>3</sub>):  $\delta$  10.07 (s, 1H, CHO), 7.95 (d,  $J$  = 6.6 Hz, 2H, *o*-phenyl-H), 7.33 (d,  $J$  = 6.6 Hz, 2H, *m*-phenyl-H), 6.96 (s, 2H, mesityl-*m*-H), 2.34 (s, 3H, mesityl-*p*-CH<sub>3</sub>), 1.99 (s, 6H, mesityl-*o*-CH<sub>3</sub>).

**Estimation of an association constant between a Zn<sup>II</sup>-porphyrin derivative and a pyridine derivative.** A solution of a Zn<sup>II</sup>-porphyrin derivative was titrated with that of a pyridine derivative in CH<sub>2</sub>Cl<sub>2</sub> at 298 K and the absorbance change at an appropriate wavelength was fitted with eq S1 (Figs. S13 and S14).

$$\text{Abs} = \epsilon_p [P]_0 L + (\epsilon_{py,p} / (2 \times K)) \times (1 + K \times [py] + K \times [P]_0) - ((1 + K \times [py] + K \times [P]_0)^2 - 4 \times K^2 \times [py] \times [P]_0)^{1/2} \quad (\text{S1})$$

Here,  $\epsilon_p$ , [P], [py],  $\epsilon_{py,p}$ , and  $K$ , refer to the absorption coefficient of the porphyrin derivative at a certain wavelength, the concentration of the porphyrin derivative, the concentration of the pyridine derivative, the absorption coefficient of the associated complex between the porphyrin derivative and the pyridine derivative at the corresponding wavelength, and the binding constant, respectively.

**X-ray diffraction analysis.** The single crystals were mounted on mounting loops. All diffraction data were collected by using a Bruker APEXII diffractometer at -153 °C (120 K) equipped with graphite-monochromated Mo K $\alpha$  ( $\lambda$  = 0.71073



Å) by the  $\omega$ -2 $\theta$  scan. The structures were solved by direct methods by using SIR97 and SHELX-2013.<sup>16</sup> Crystallographic data for these compounds are summarized in Table S4. CCDC-1050826 (**5**-py), -1050827 (**5**-dox) and -1050828 (**8**-py), contain the supplementary crystallographic data. Recrystallization of the *t*-Bu derivative **5** from the solution in chlorobenzene in the presence of 1 drop of py by slow concentration afforded single crystals of **5**-py. On the other hand, recrystallization of **5** from the 1,4-dioxane solution by deposition of 2-propanol vapour as a poor solvent gave single crystals of **5**-dox. One molecule of **5**-py and two co-crystallized chlorobenzene molecules were involved in the asymmetric unit, whereas the asymmetric unit of the crystal of **5**-dox contained one molecule of **5**-dox and two co-crystallized dox molecules and one 2-propanol molecule. One of the two co-crystallized dox molecules in the crystal of **5**-dox was severely disordered and deleted by using the SQUEEZE program.<sup>17</sup> A single crystal of **8**-py was obtained by recrystallization from the pyridine solution with a vapour deposition method using MeCN as a poor solvent. Two independent molecules of **8**-py and one MeCN molecule as a co-crystallized solvent molecule were found in the asymmetric unit. The co-crystallized MeCN molecule was highly disordered and treated with the SQUEEZE program to be deleted.<sup>17</sup> The crystallographic parameters are summarized in Table S4.

**Computational method.** The structures of porphyrin derivatives were optimized by using the B3LYP functional.<sup>18</sup> The 6-31G(d) basis set<sup>19,20</sup> was used for all atoms. The program used was Gaussian 09.<sup>21</sup> Time-dependent density functional theory (TD-DFT)<sup>22</sup> has been used to calculate the excited-state energies.

## Reference and Notes

- (1) T. Ishizuka, Y. Saegusa, Y. Shiota, K. Ohtake, K. Yoshizawa and T. Kojima, *Chem. Commun.*, 2013, **49**, 5939.
- (2) S. Higashibayashi and H. Sakurai, *Chem. Lett.*, 2007, **36**, 18.
- (3) A. D. Adler, F. R. Longo, J. D. Finarelli, J. Goldmacher, J. Assour and L. Korsakoff, *J. Org. Chem.*, 1967, **32**, 476.
- (4) J. Arnold, D. Y. Dawson and C. C. Hoffman, *J. Am. Chem. Soc.*, 1993, **115**, 2707.
- (5) M. O'Rourke and C. Curran, *J. Am. Chem. Soc.*, 1970, **92**, 1501.
- (6) K. M. Kadish and M. M. Morrison, *J. Am. Chem. Soc.*, 1976, **98**, 3326.
- (7) S. S. Eaton and G. R. Eaton, *J. Am. Chem. Soc.*, 1975, **97**, 3660.
- (8) J. S. Lindsey and R. W. Wagner, *J. Org. Chem.*, 1989, **54**, 828.
- (9) M. J. Crossley, P. L. Bum, S. S. Chew, F. B. Cuttance and I. A. Newsom, *J. Chem. Soc., Chem. Commun.*, 1991, 1564.
- (10) P. K. Kumar, P. Bhyrappa and B. Varghese, *Tetrahedron Lett.* **2003**, *44*, 4849.
- (11) P. Bhyrappa, V. Velkannan, K. Karunanithi, B. Varghese and Harikrishna, *Bull. Chem. Soc. Jpn.*, 2008, **81**, 995.
- (12) Y. Terazono, B. O. Patrick and D. H. Dolphin, *Inorg. Chem.*, 2002, **41**, 6703.

- (13) P. Bhyrappa and V. Velkannan, *J. Porphyrins Phthalocyanines*, 2011, **15**, 883.
- (14) T. Leermann, F. R. Leroux and F. Colobert, *Org Lett.*, 2011, **13**, 4479.
- (15) Y. Nakayama, Y. Baba, H. Yasuda, K. Kawakita and N. Ueyama, *Macromolecules*, 2003, **36**, 7953.
- (16) Sheldrick, G. M. SIR97 and SHELX97, Programs for Crystal Structure Refinement, University of Göttingen, Göttingen (Germany), 1997.
- (17) P. V. D. Sluis and A. L. Spek, *Acta Crystallogr.*, 1990, **A46**, 194.
- (18) (a) A. D. Becke, *Phys. Rev. A*, 1988, **38**, 3098; (b) C. Lee, W. Yang and R. G. Parr, *Phys. Rev. B*, 1988, **37**, 785; (c) A. D. Becke, *J. Chem. Phys.*, 1993, **98**, 5648.
- (19) M. M. Francl, W. J. Pietro, W. J. Hehre, J. S. Binkley, M. S. Gordon, D. J. DeFrees and J. A. Pople, *J. Chem. Phys.*, 1982, **77**, 3654.
- (20) V. Rassolov, J. A. Pople, M. Ratner and T. L. Windus, *J. Chem. Phys.*, 1998, **109**, 1223.
- (21) Gaussian 09 (Revision D.01), M. J. Frisch, G. W. Trucks, H. B. Schlegel, G. E. Scuseria, M. A. Robb, J. R. Cheeseman, G. Scalmani, V. Barone, B. Mennucci, G. A. Petersson, H. Nakatsuji, M. Caricato, X. Li, H. P. Hratchian, A. F. Izmaylov, J. Bloino, G. Zheng, J. L. Sonnenberg, M. Hada, M. Ehara, K. Toyota, R. Fukuda, J. Hasegawa, M. Ishida, T. Nakajima, Y. Honda, O. Kitao, H. Nakai, T. Vreven, J. A. Montgomery, Jr., J. E. Peralta, F. Ogliaro, M. Bearpark, J. J. Heyd, E. Brothers, K. N. Kudin, V. N. Staroverov, R. Kobayashi, J. Normand, K. Raghavachari, A. Rendell, J. C. Burant, S. S. Iyengar, J. Tomasi, M. Cossi, N. Rega, M. J. Millam, M. Klene, J. E. Knox, J. B. Cross, V. Bakken, C. Adamo, J. Jaramillo, R. Gomperts, R. E. Stratmann, O. Yazyev, A. J. Austin, R. Cammi, C. Pomelli, J. W. Ochterski, R. L. Martin, K. Morokuma, V. G. Zakrzewski, G. A. Voth, P. Salvador, J. J. Dannenberg, S. Dapprich, A. D. Daniels, Ö. Farkas, J. B. Foresman, J. V. Ortiz, J. Cioslowski and D. J. Fox, Gaussian, Inc., Wallingford CT, 2009.
- (22) (a) E. K. U. Gross, J. F. Dobson and M. Petersilka, *In Density Functional Theory*; R. F. Nalewajski, Ed.; Springer: Heidelberg, 1996. (b) M. E. Casida, *In Recent Advances in Density Functional Methods*; D. P. Chong, Ed.; World Scientific: Singapore, 1995; Vol. 1, pp 155–193.

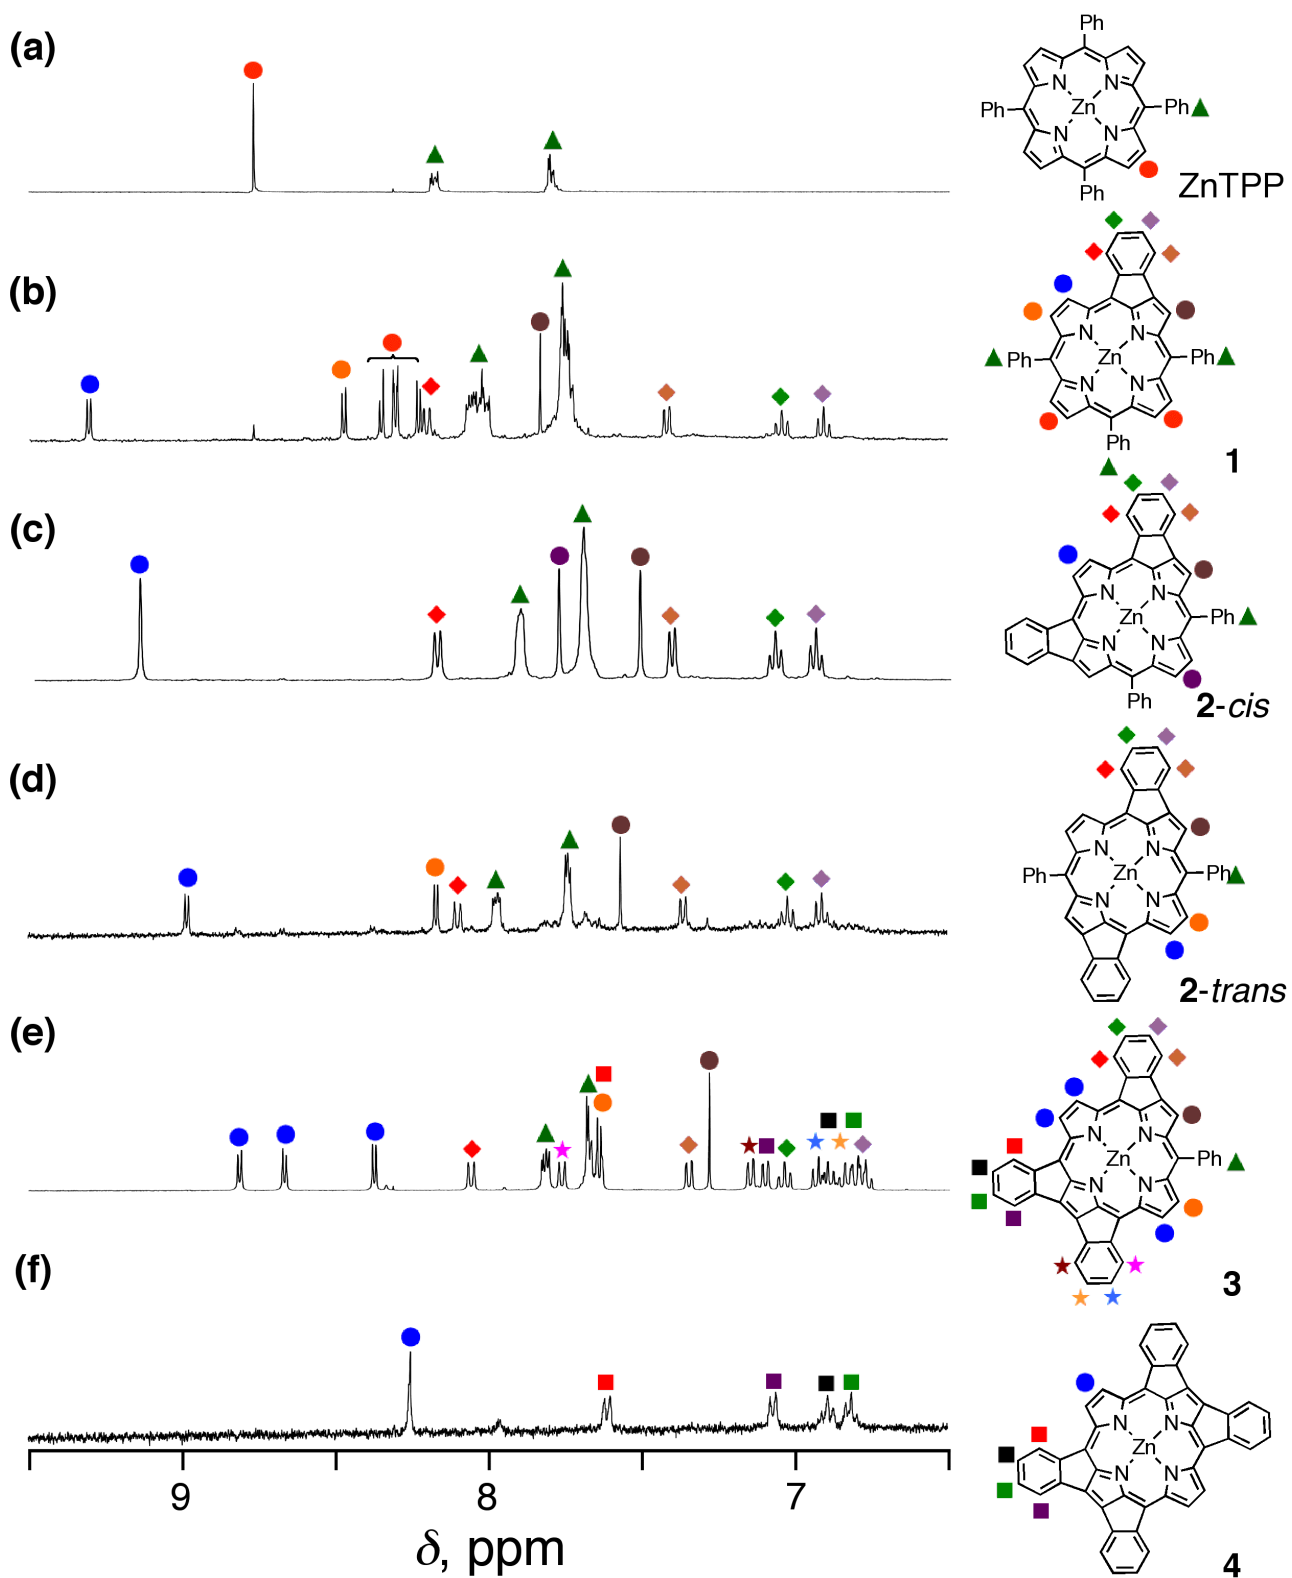

**Fig. S1**  $^1\text{H}$  NMR spectra of the fused porphyrins in  $\text{DMSO}-d_6$  at 298 K; (a) ZnTPP, (b) 1, (c) 2-cis, (d) 2-trans, (e) 3, and (f) 4.

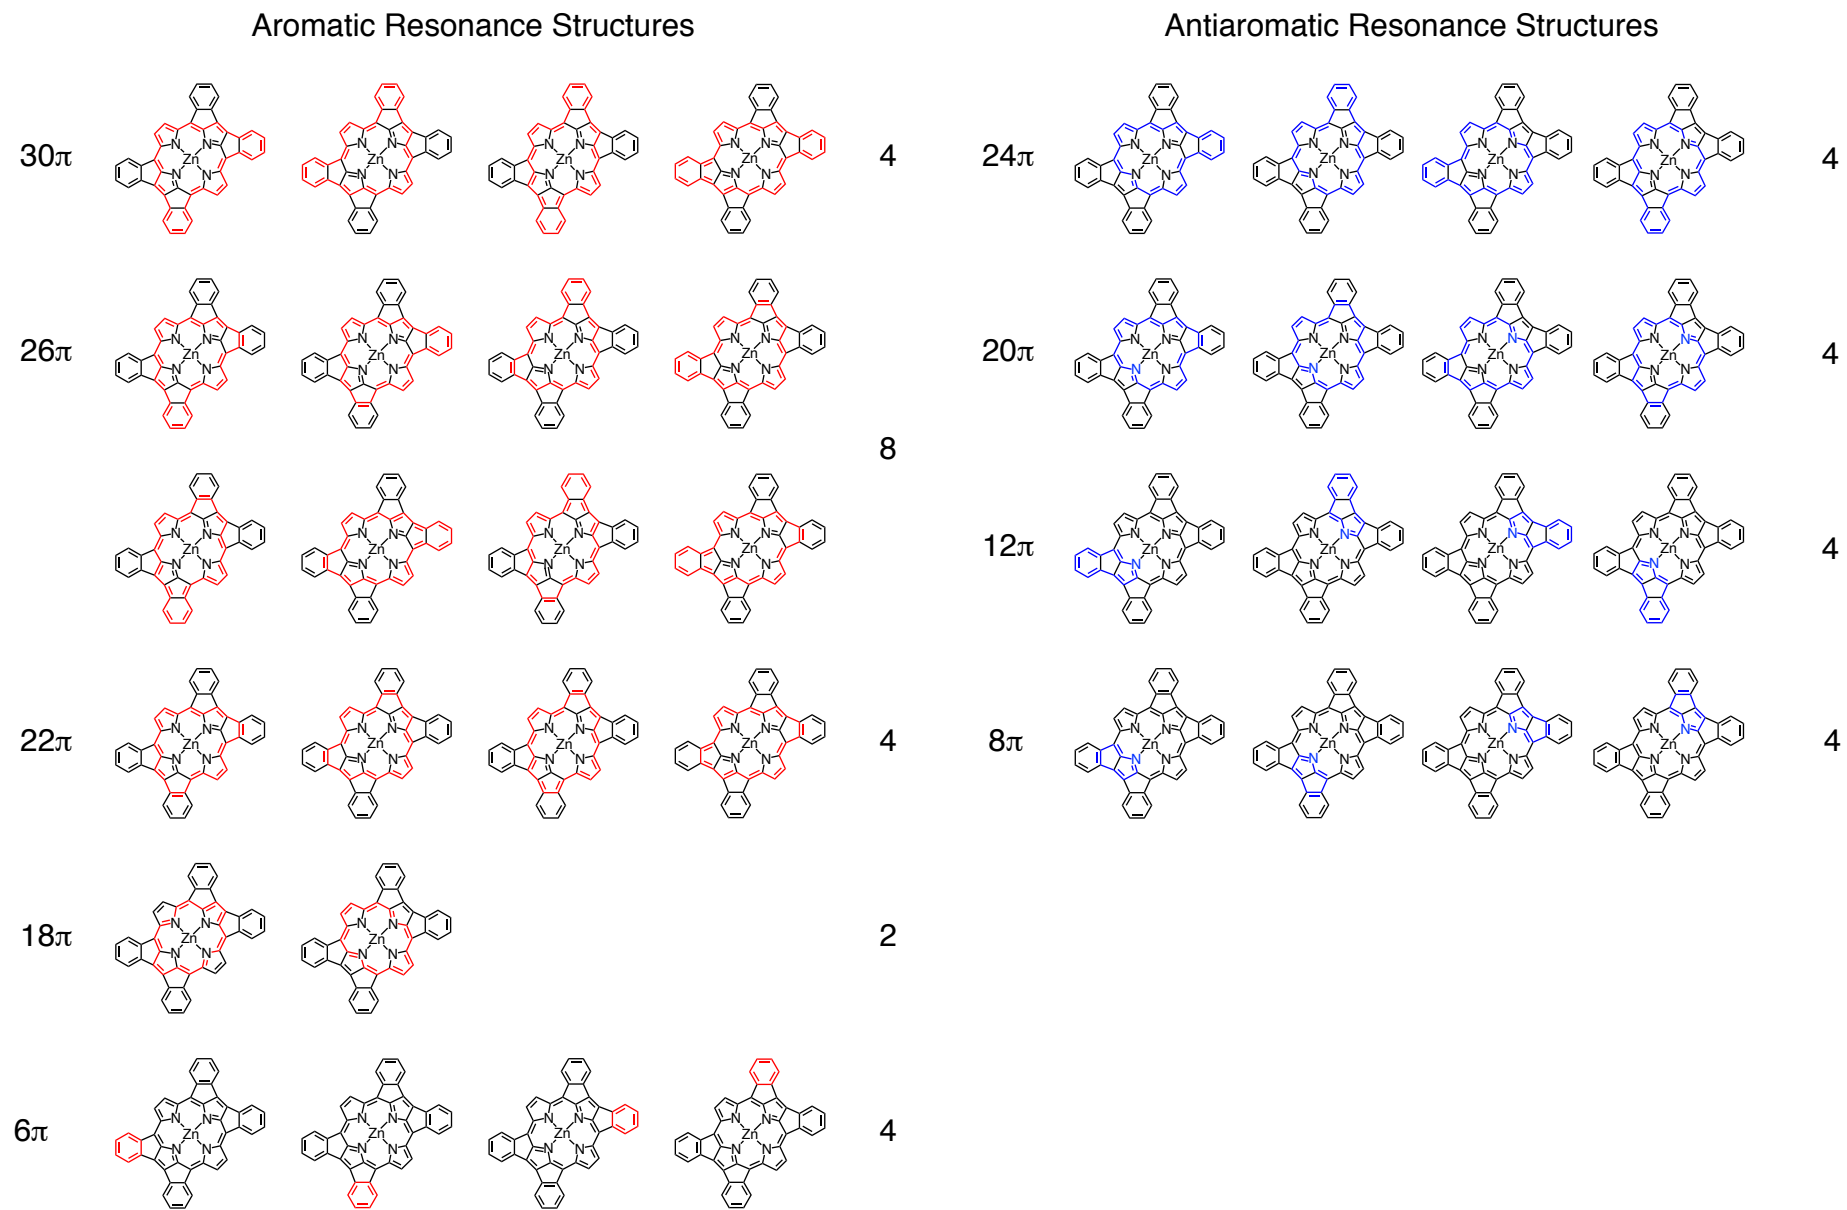

**Fig. S2** Possible resonance structures of **4** having different aromatic circuits.

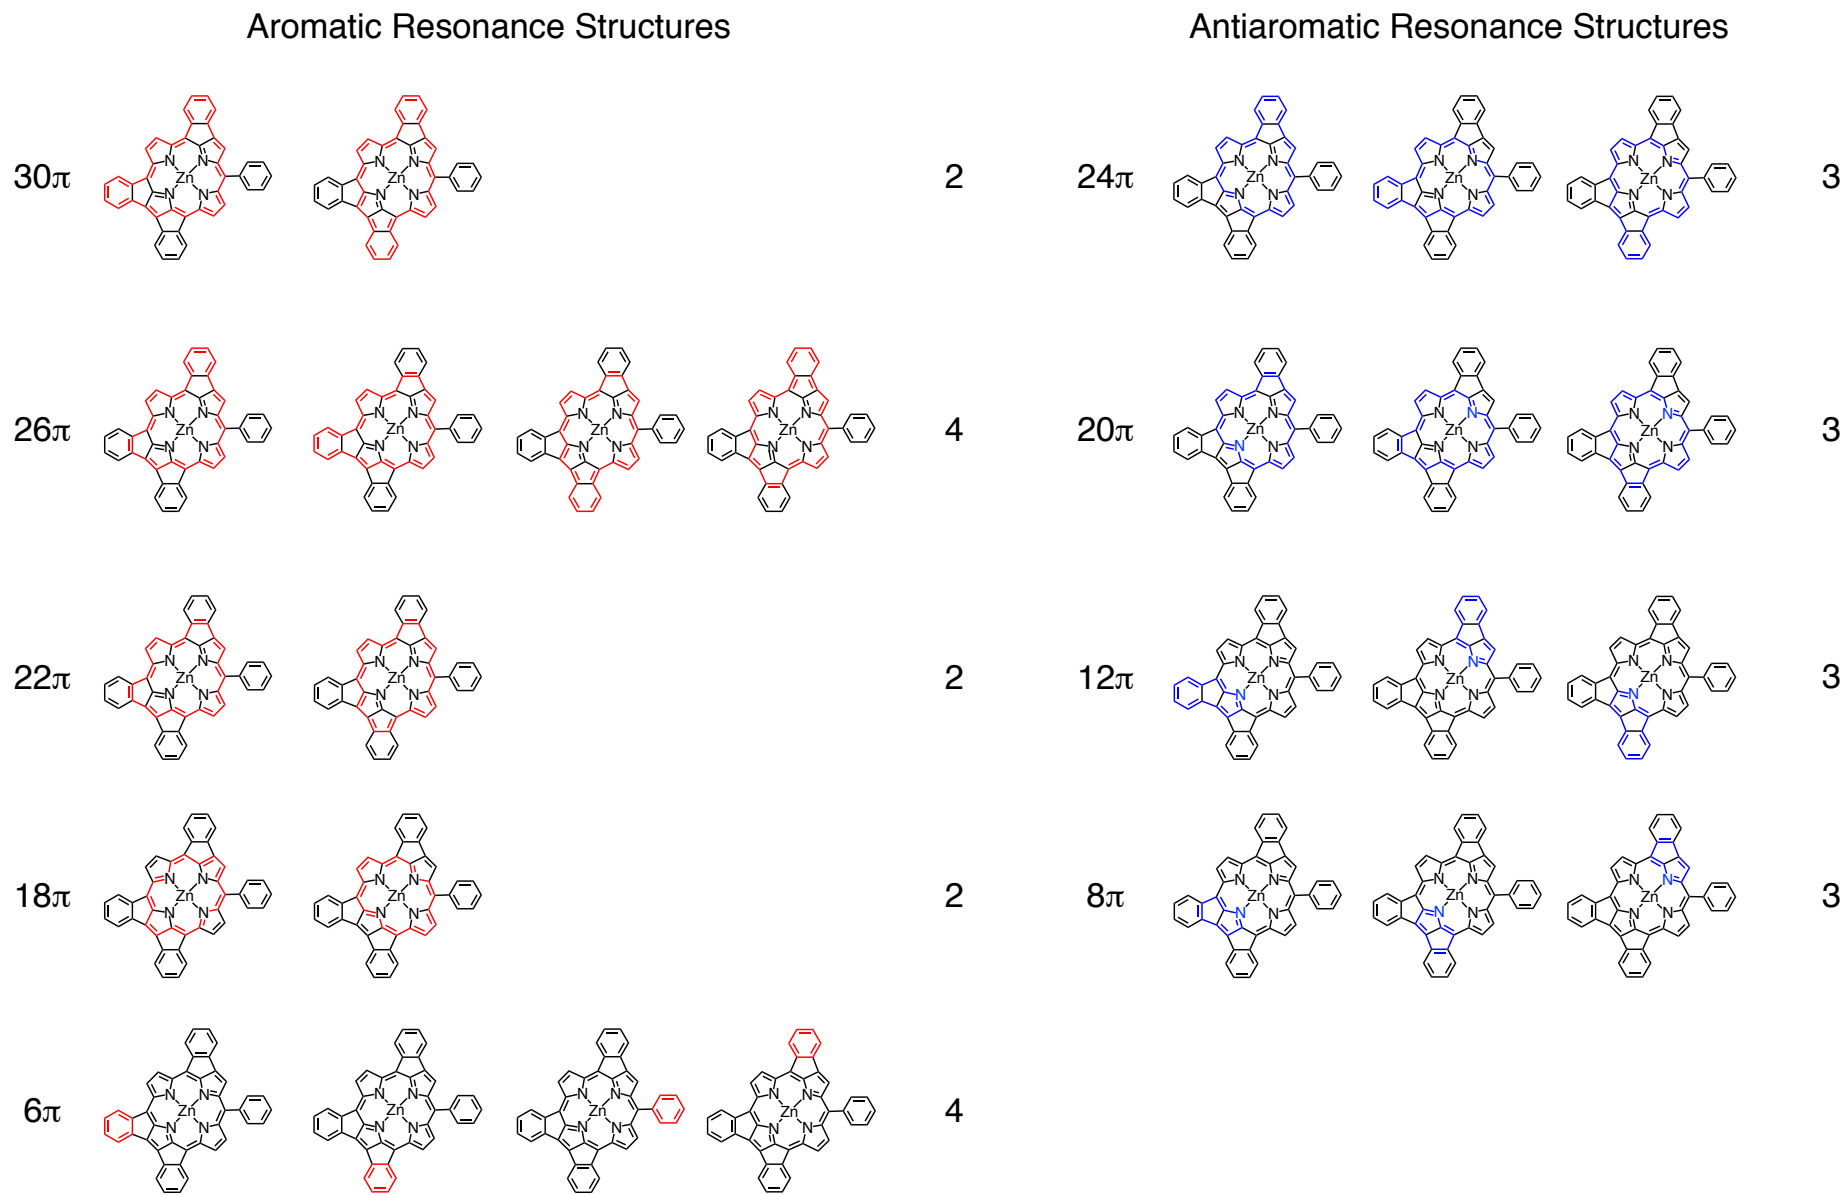

**Fig. S3** Possible resonance structures of **3** having different aromatic circuits.

### Aromatic Resonance Structures

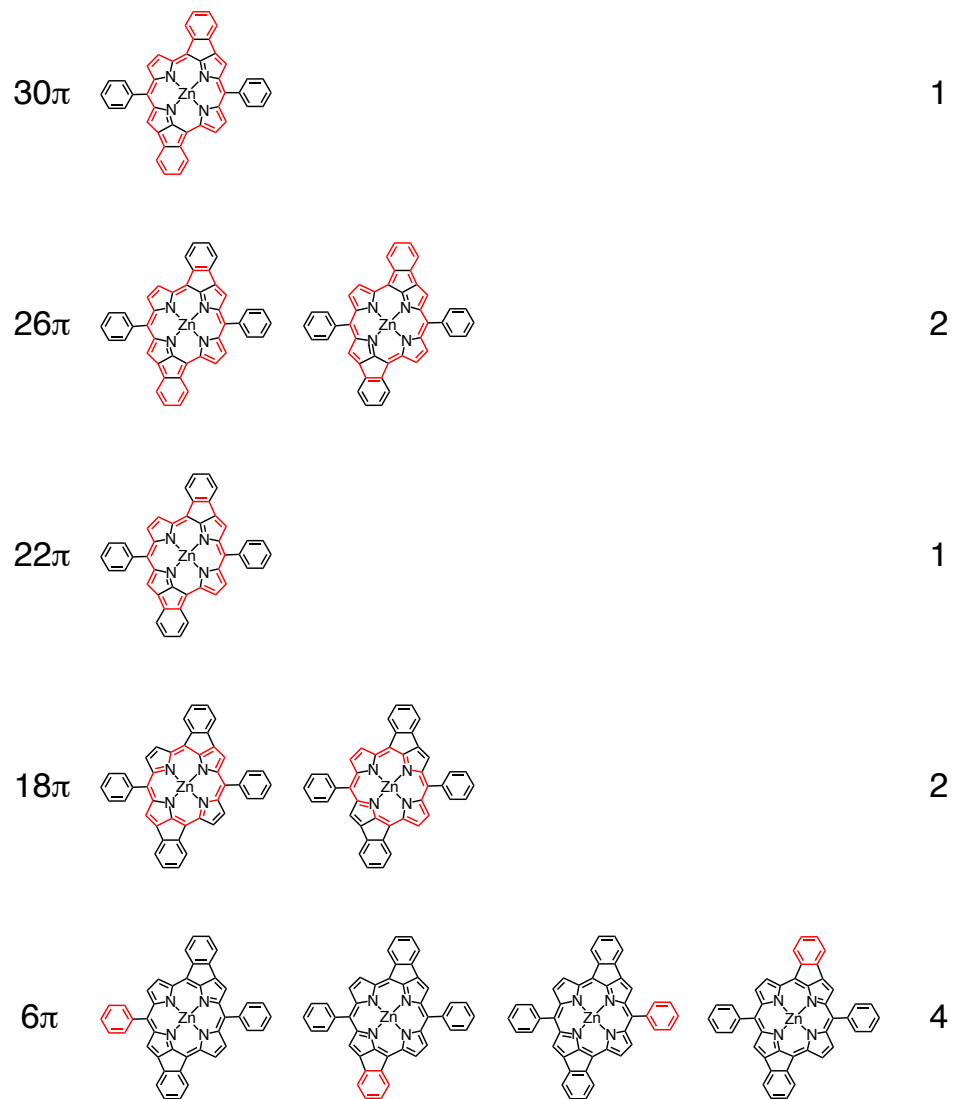

### Antiaromatic Resonance Structures

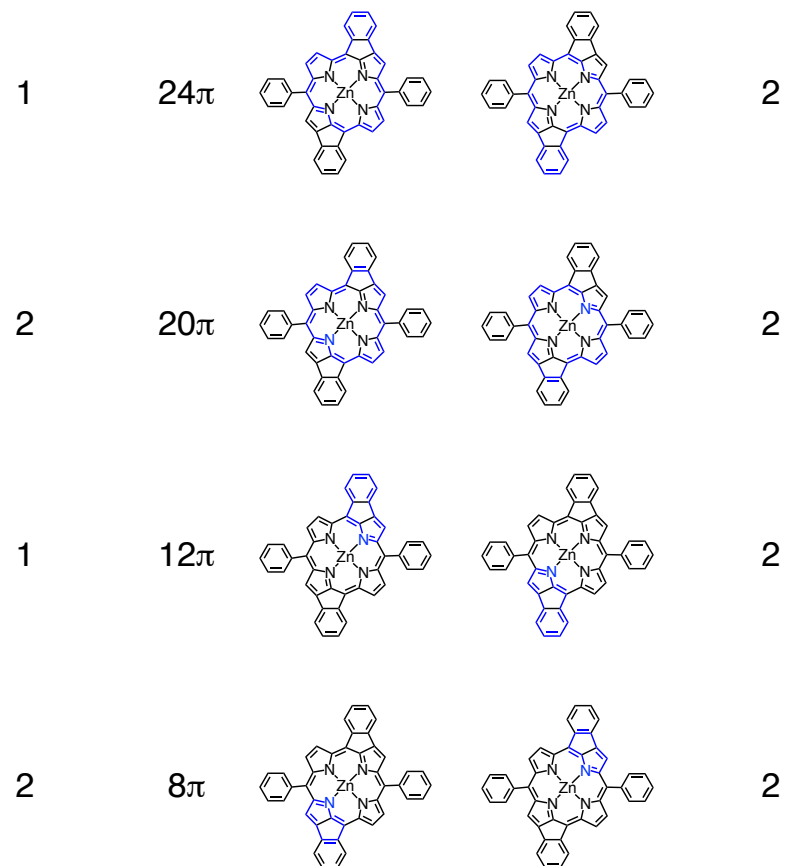

**Fig. S4** Possible resonance structures of **2-trans** having different aromatic circuits.

### Aromatic Resonance Structures

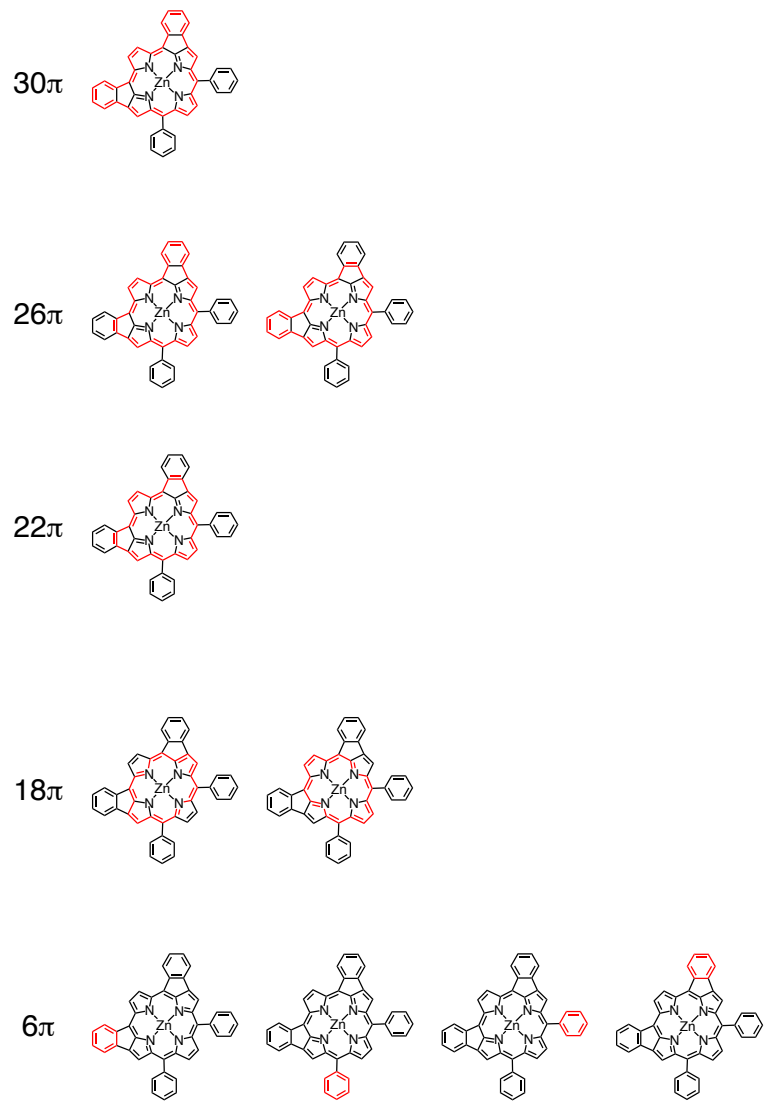

### Antiaromatic Resonance Structures

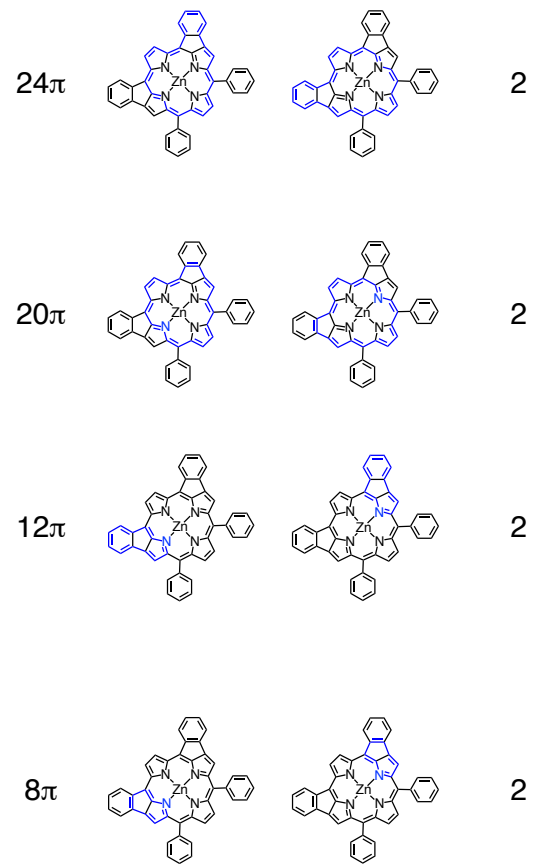

**Fig. S5** Possible resonance structures of **2-cis** having different aromatic circuits.

### Aromatic Resonance Structures

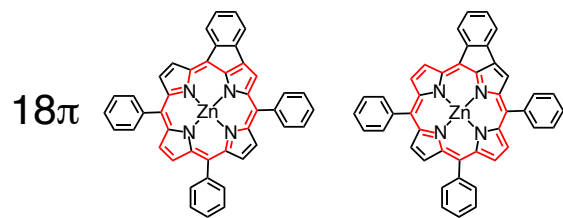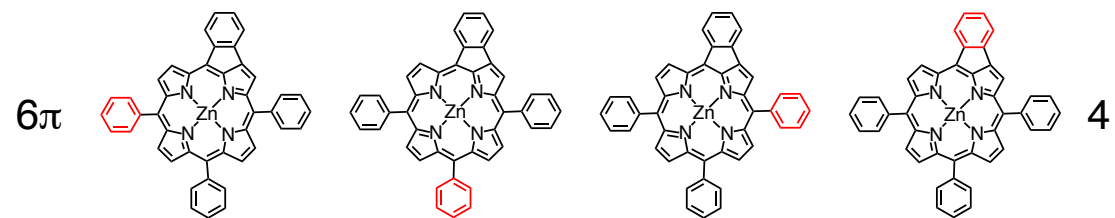

### Antiaromatic Resonance Structures

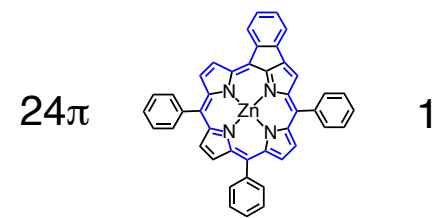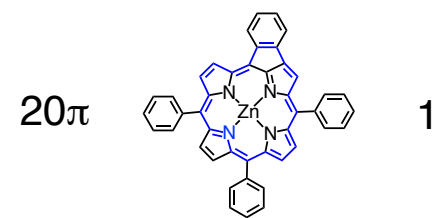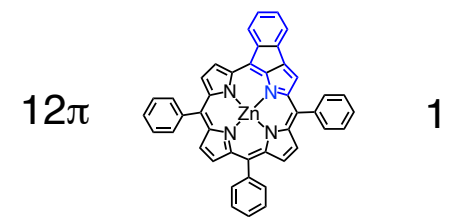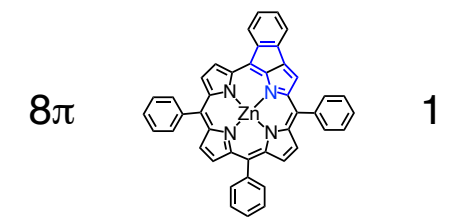

**Fig. S6** Possible resonance structures of **1** having different aromatic circuits.



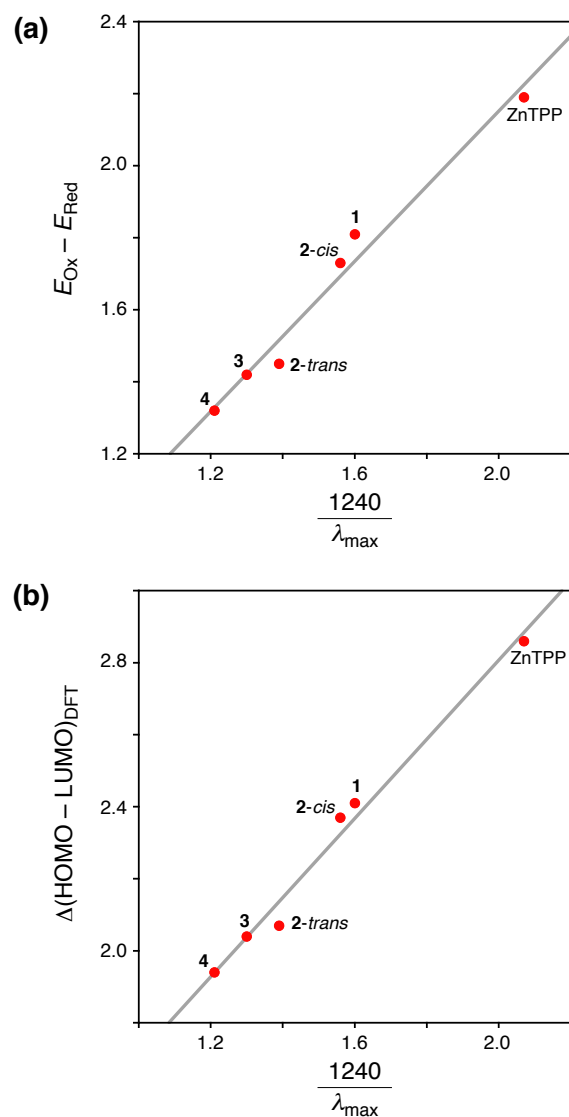

**Fig. S7** Plots of HOMO-LUMO gaps obtained from the electrochemical measurements and DFT calculations against that obtained from the longest wavelengths of absorption maxima. As the HOMO-LUMO gaps obtained from the electrochemical studies were used the differences of the first oxidation and reduction potentials, and the HOMO-LUMO gaps obtained from the UV-vis absorption spectra were calculated as  $1240/\lambda_{\text{max}}$ , where  $\lambda_{\text{max}}$  stands for the wavelength (nm) of the lowest-energy absorption band of each compound.

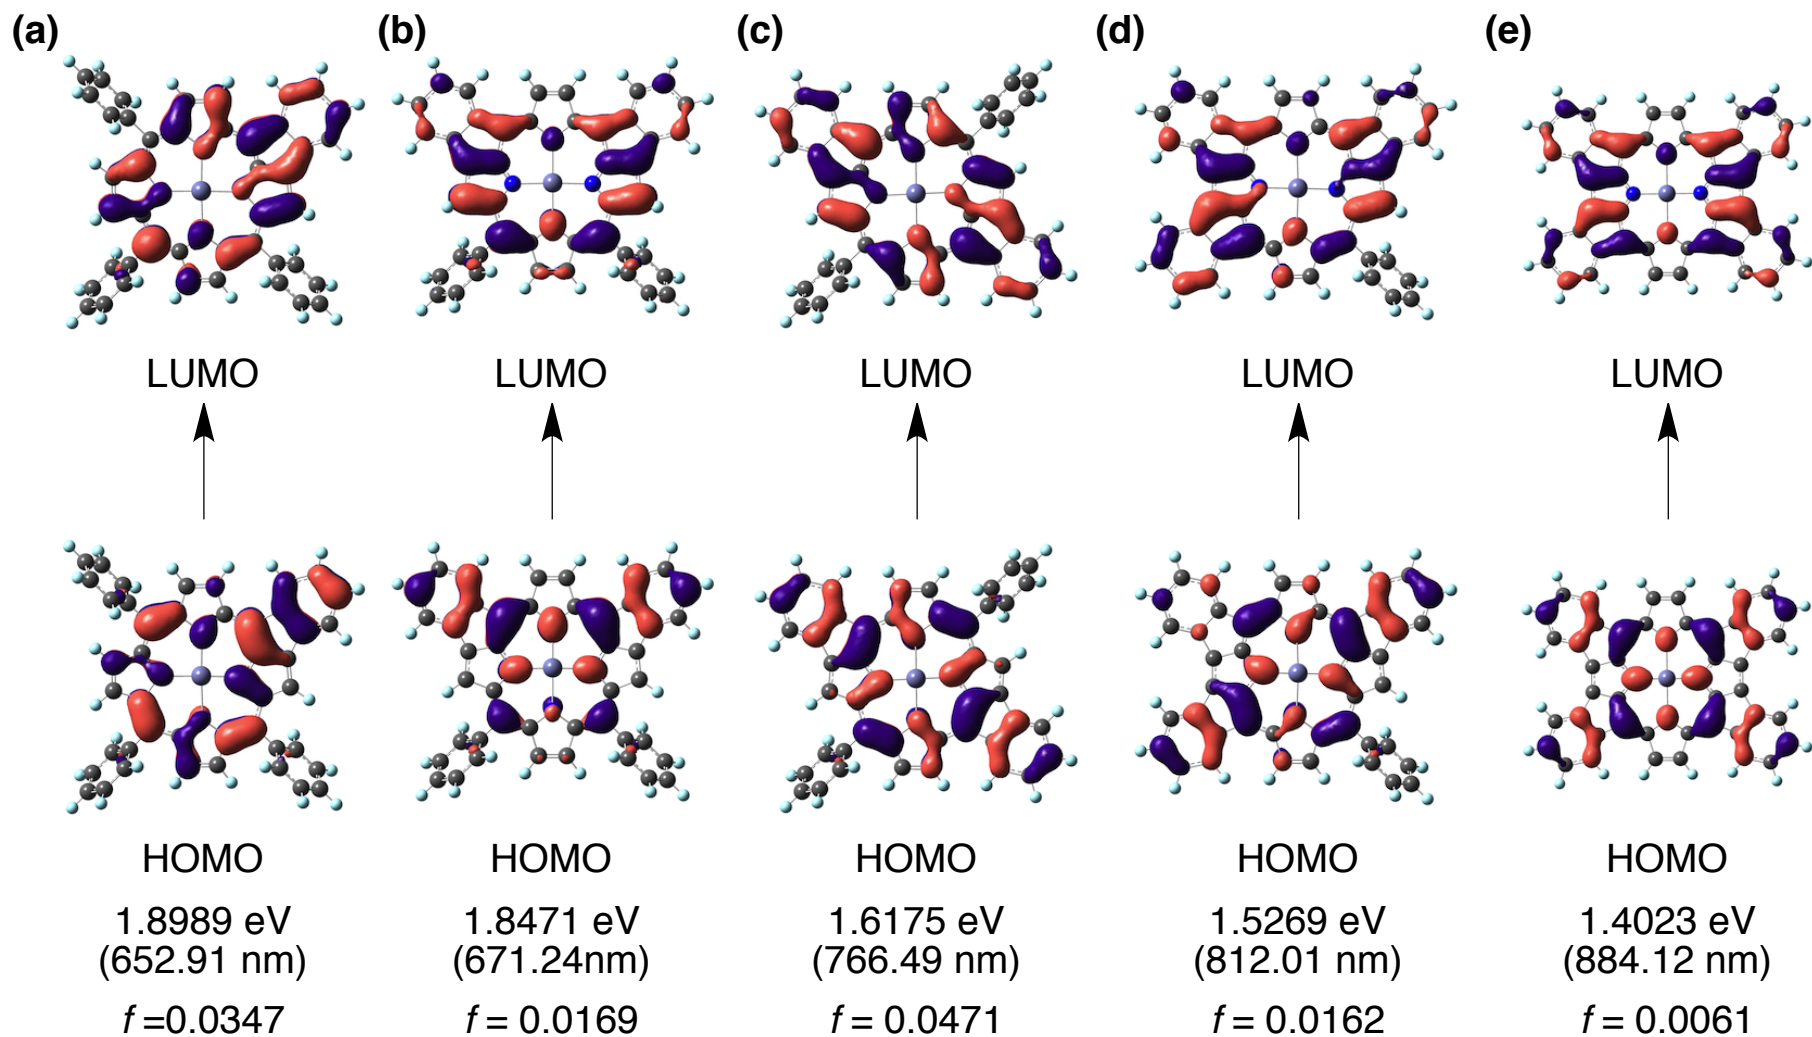

**Fig. S8** The frontier orbitals related to the lowest-energy absorption bands with the transition energies and oscillator strengths ( $f$ ) for **1** (a), **2-*cis*** (b), **2-*trans*** (c), **3** (d) and **4** (e), obtained from TD-DFT calculations at the B3LYP/6-31G(d) level of theory.

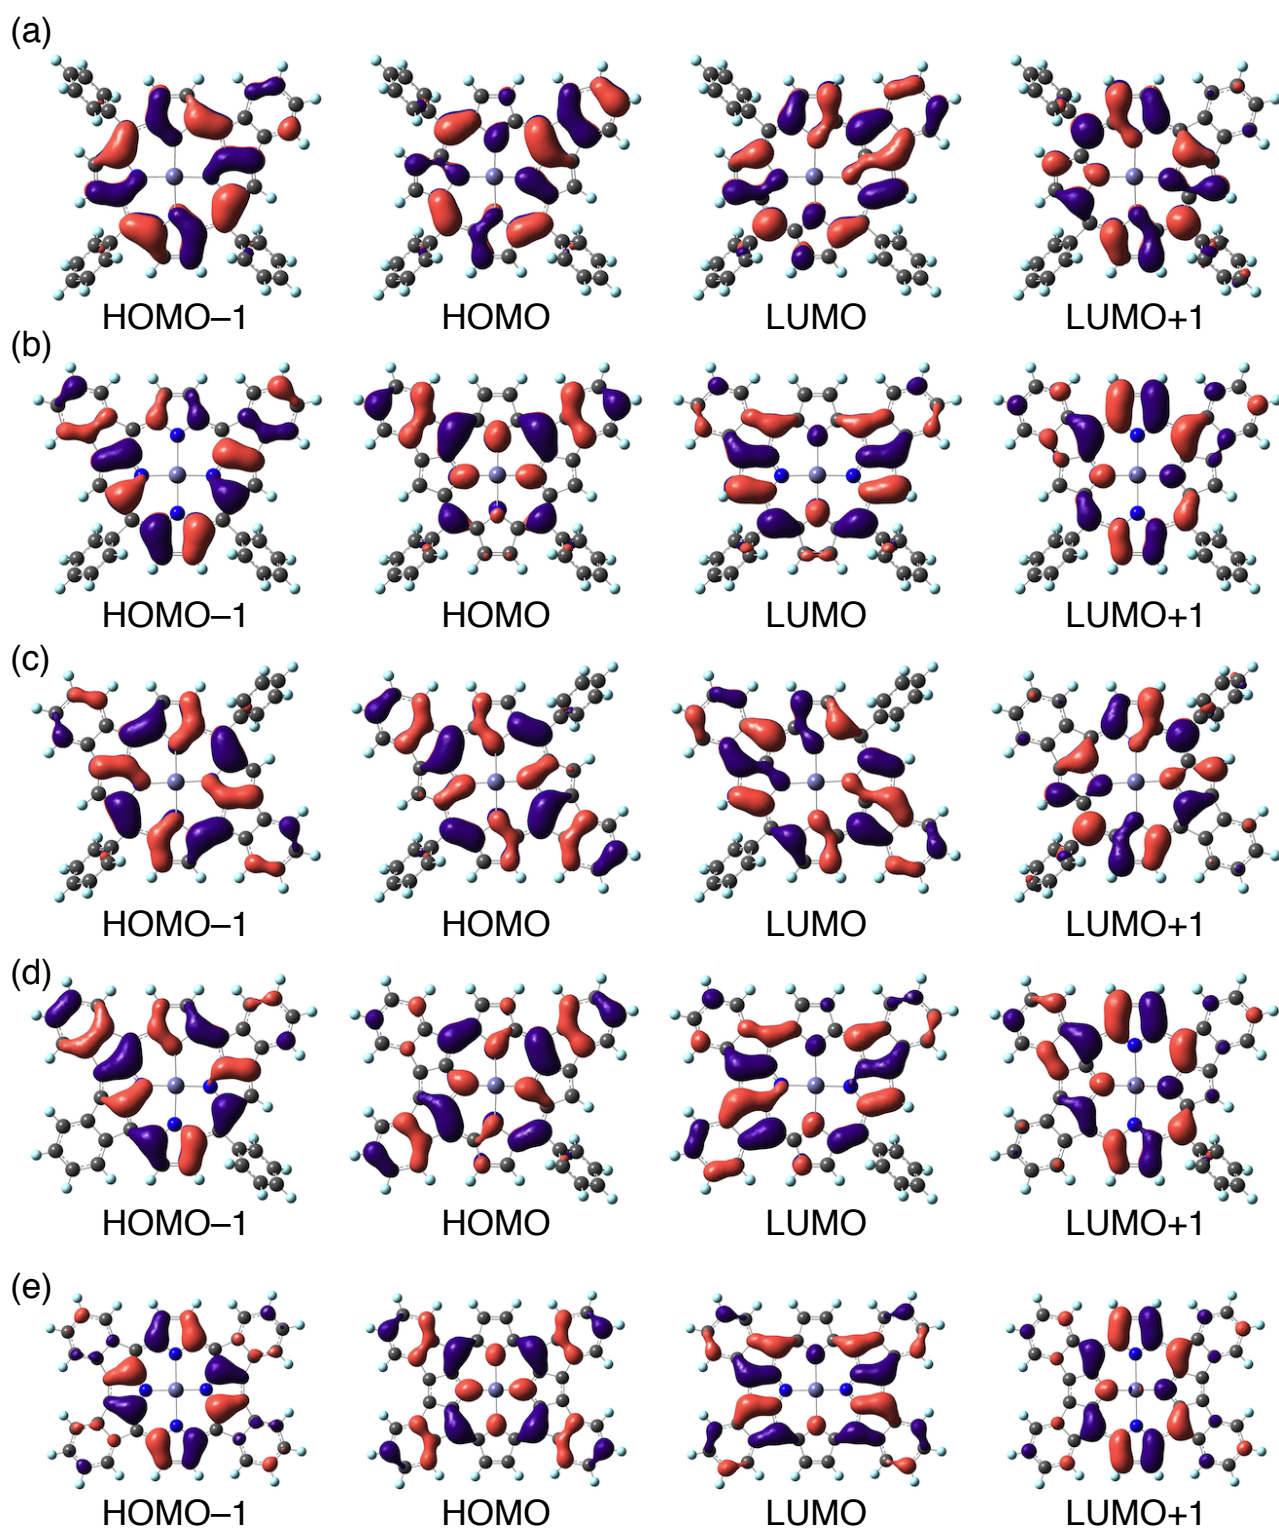

**Fig. S9** The frontier four orbitals of **1** (a), **2-cis** (b), **2-trans** (c), **3** (d) and **4** (d), obtained from DFT calculations at the B3LYP/6-31G(d) level of theory.

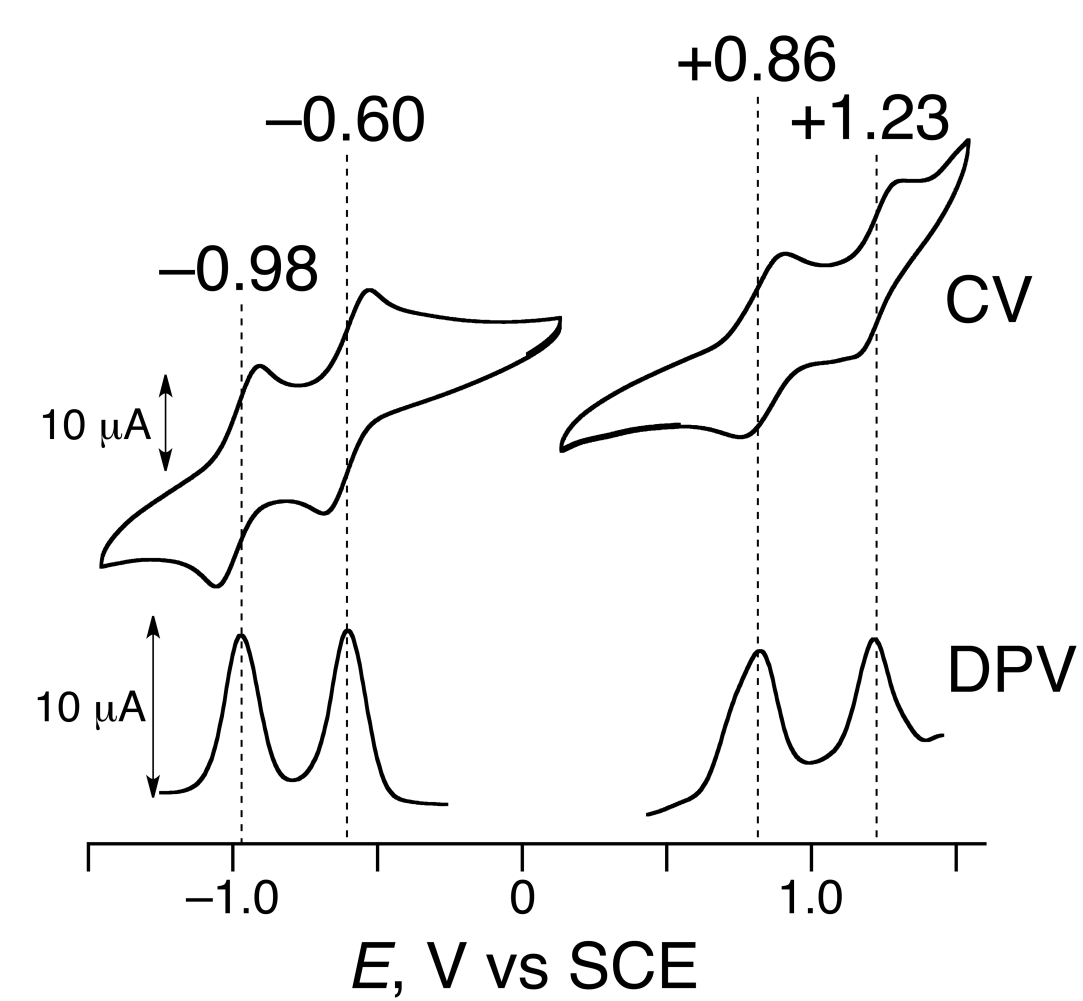

**Fig. S10** Cyclic (above) and differential-pulse (below) voltammograms of **9** in THF at room temperature in the presence of  $[(n\text{-Bu})_4\text{N}](\text{PF}_6)$  (0.1 M) as an electrolyte.

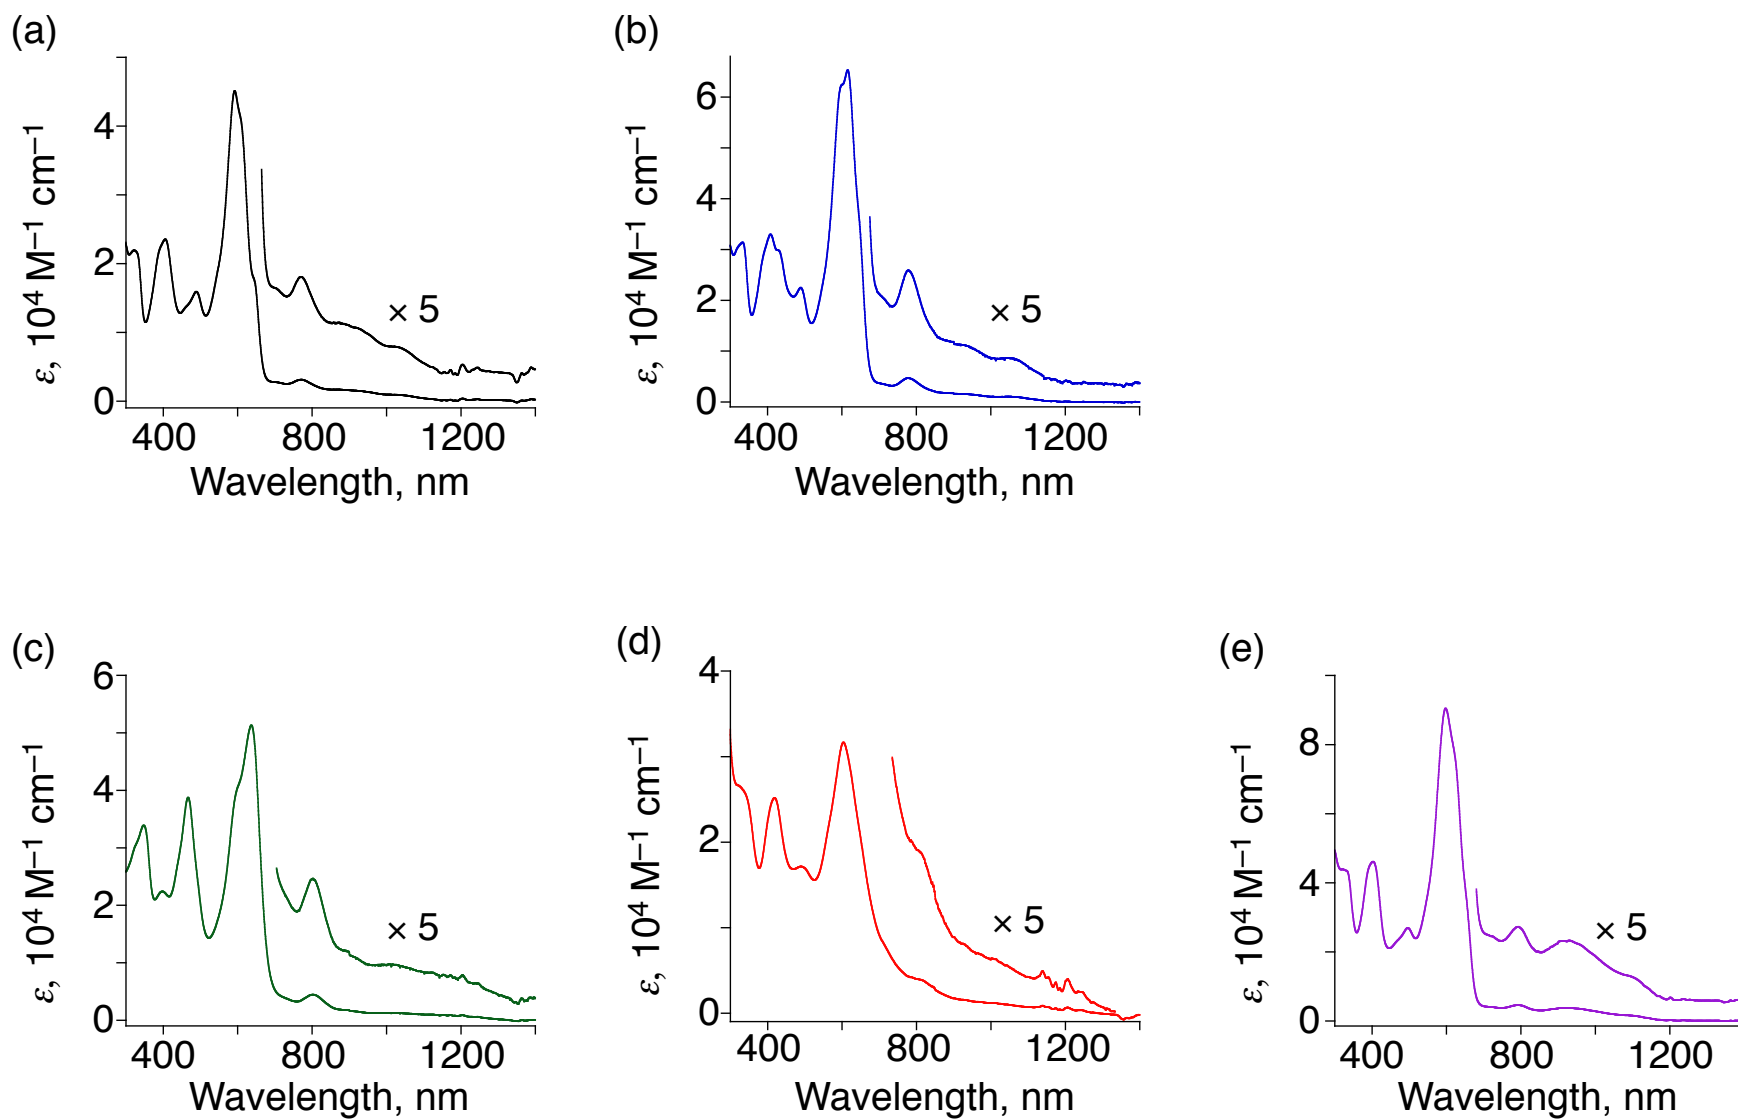

**Fig. S11** UV-Vis spectra of the ZnQFP derivatives in DMF at 298 K; (a) **4**, (b) **5**, (c) **6**, (d) **7**, and (e) **8**.

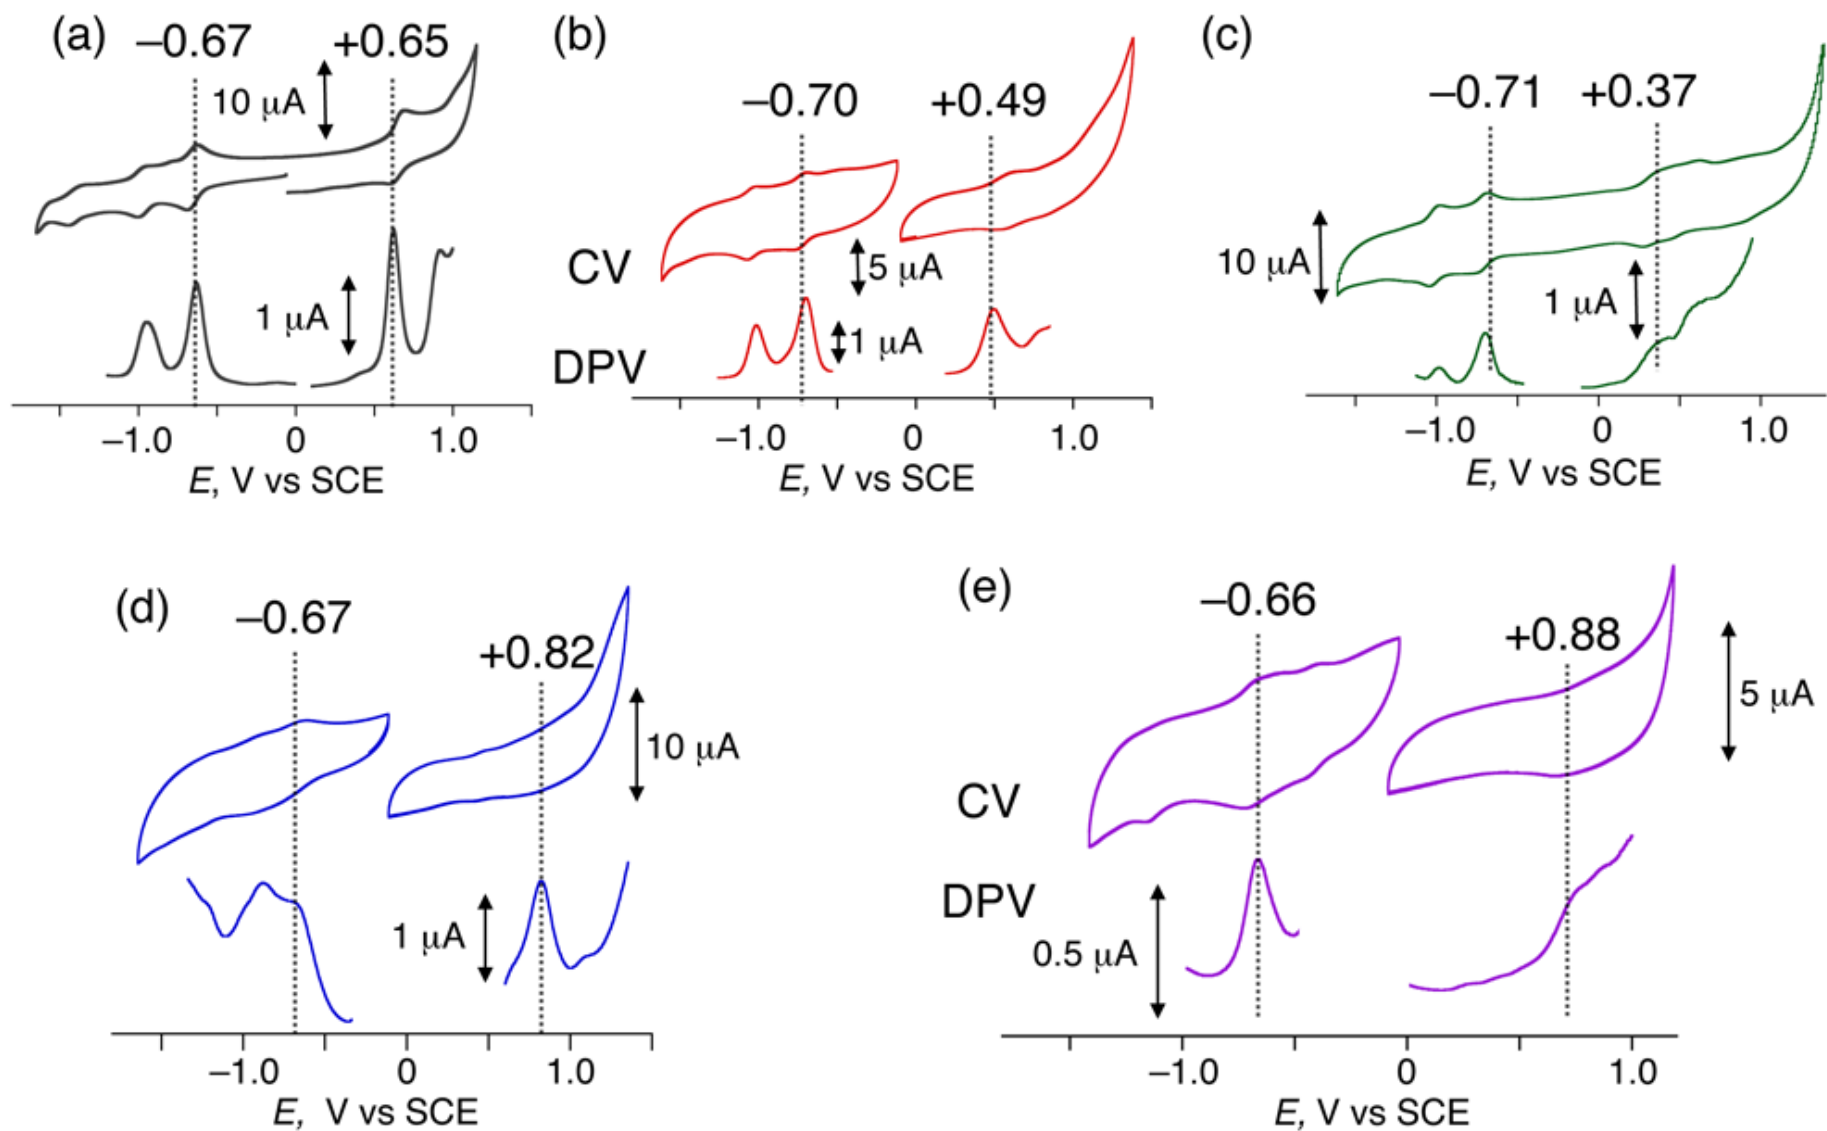

**Fig. S12** Cyclic (above) and differential-pulse (below) voltammograms of the ZnQFP derivatives in DMF containing 0.1 M TBAPF<sub>6</sub> as an electrolyte at room temperature: (a) **4**, (b) **5**, (c) **6**, (d) **7**, and (e) **8**.

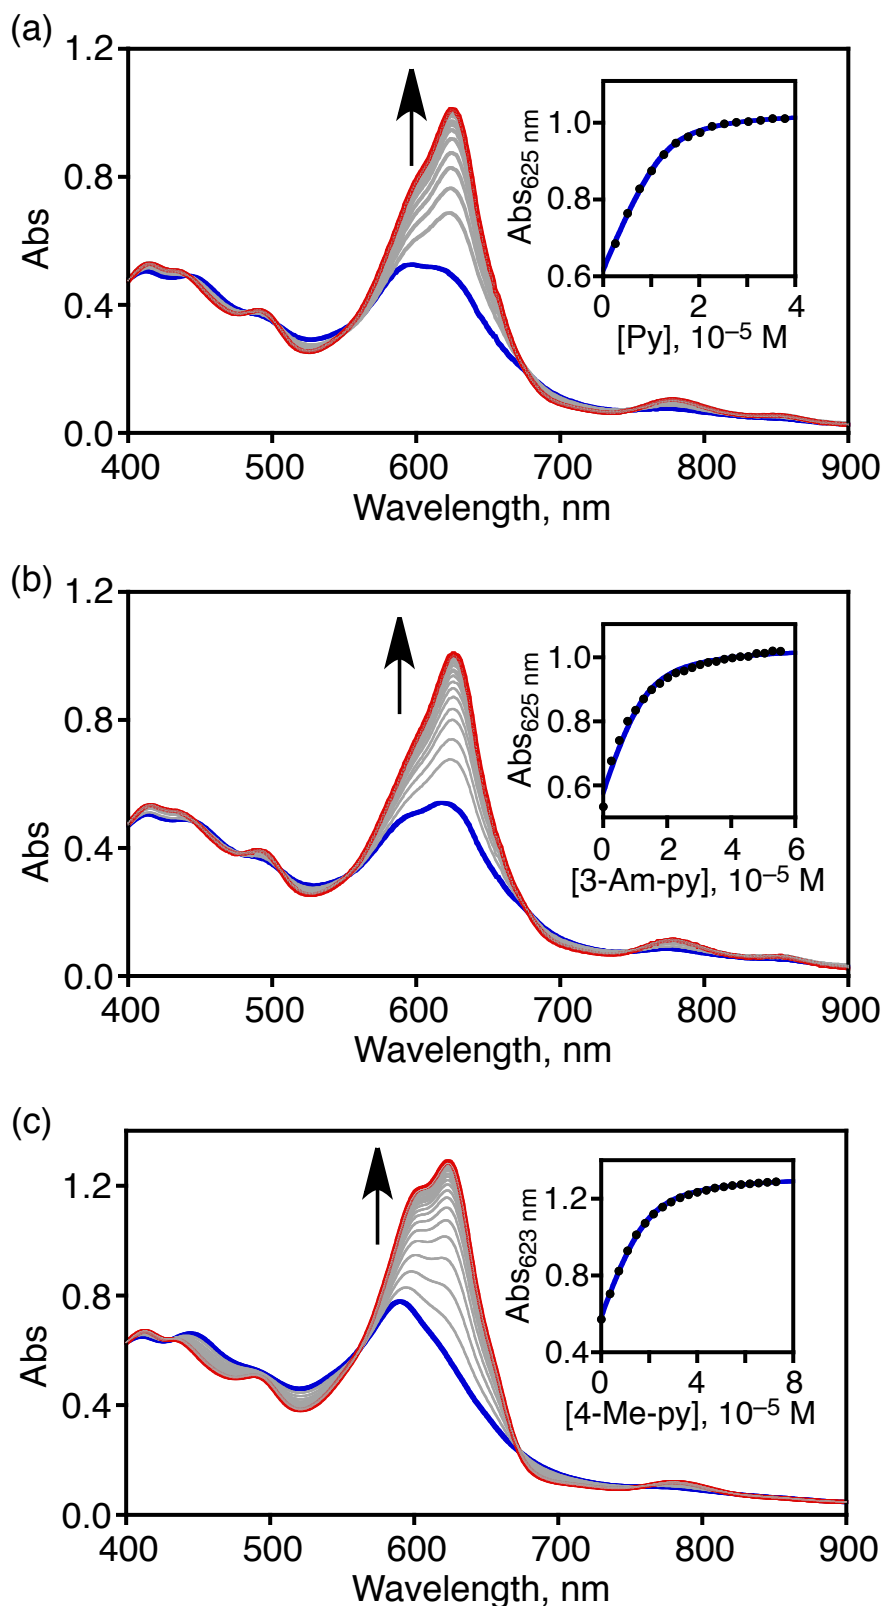

**Fig. S13** UV-Vis spectral changes upon titration of **9** with py (a), 3-Am-py (b), and 4-Me-py (c) in  $\text{CH}_2\text{Cl}_2$  at 298 K. Inset: the absorbance changes at 625 nm for (a) and (c), 623 nm for (b), fitted with eq S1. The concentrations of **9** were  $1.26 \times 10^{-5}$  M for (a) and (c), and  $1.82 \times 10^{-5}$  M for (b).

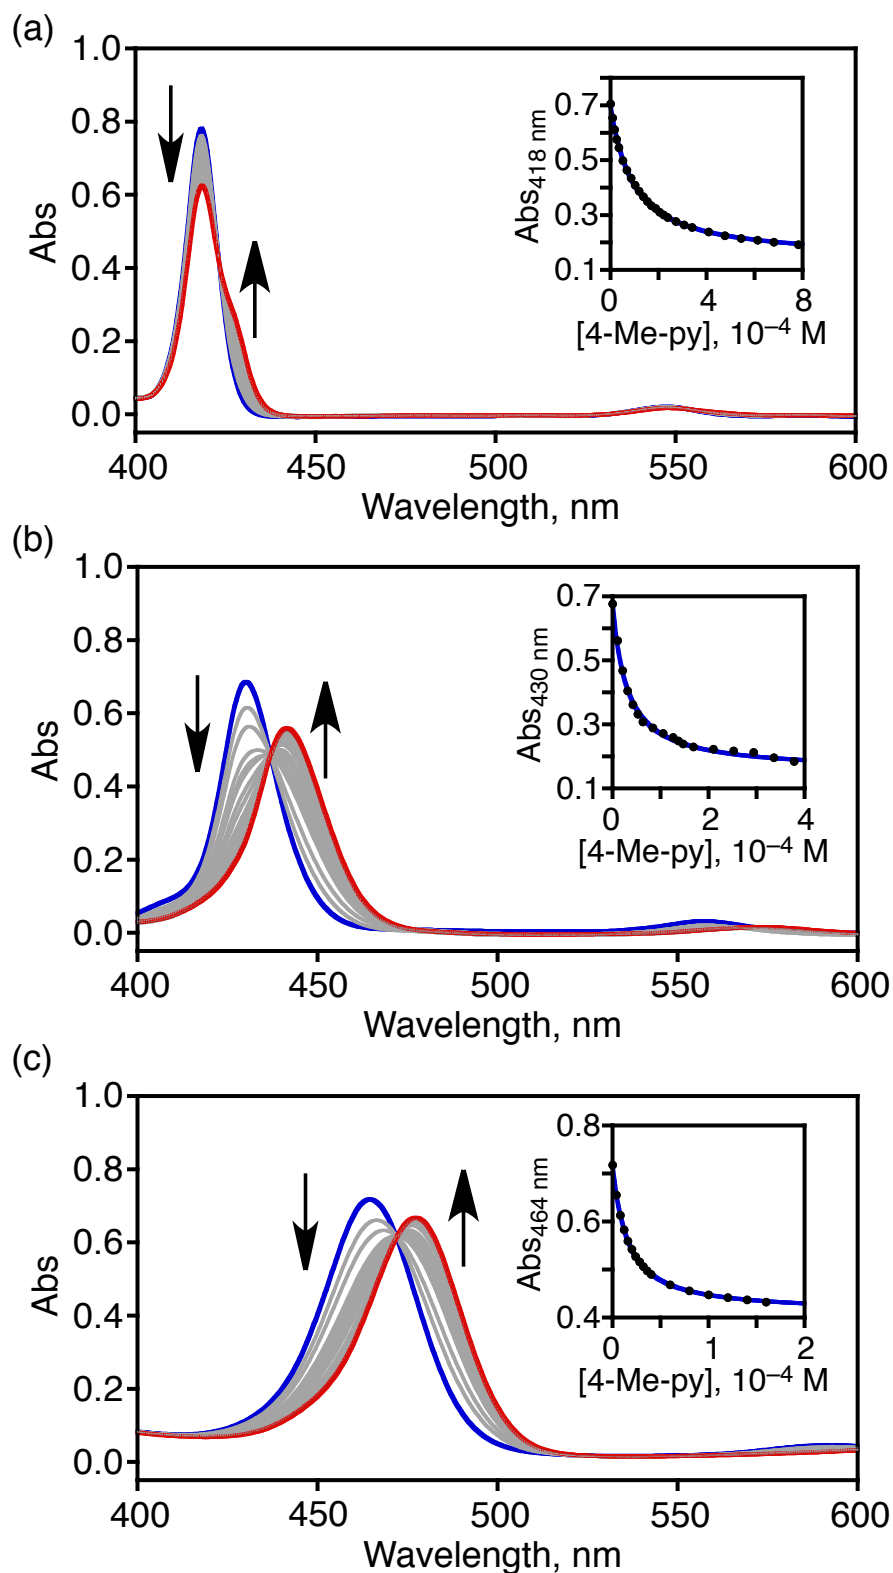

**Fig. S14** UV-Vis spectral changes upon titration of ZnTPP (a), ZnOPP (b) and ZnDPP (c) with 4-Me-py in CH<sub>2</sub>Cl<sub>2</sub> at 298 K. Inset: the absorbance changes at 418 nm for (a), 430 nm for (b), 464 nm for (c) fitted with eq S1. The concentrations of porphyrin derivatives were  $1.82 \times 10^{-6}$  M for (a),  $2.1 \times 10^{-6}$  M for (b), and  $4.1 \times 10^{-6}$  M for (c).



**Table S1** Summary for the numbers of possible resonance structures having different aromatic and antiaromatic circuits for the fused porphyrin derivatives

| Number of $\pi$ -electrons                                            | <b>1</b> | <b>2-<i>cis</i></b> | <b>2-<i>trans</i></b> | <b>3</b> | <b>4</b> |
|-----------------------------------------------------------------------|----------|---------------------|-----------------------|----------|----------|
| Aromatic and antiaromatic circuits with the whole porphyrin structure |          |                     |                       |          |          |
| 18 $\pi$                                                              | 2        | 2                   | 2                     | 2        | 2        |
| 20 $\pi$                                                              | 1        | 2                   | 2                     | 3        | 4        |
| 22 $\pi$                                                              | —        | 1                   | 1                     | 2        | 4        |
| 24 $\pi$                                                              | 1        | 2                   | 2                     | 3        | 4        |
| 26 $\pi$                                                              | —        | 2                   | 2                     | 4        | 8        |
| 30 $\pi$                                                              | —        | 1                   | 1                     | 2        | 4        |
| Aromatic and antiaromatic circuits with the partial structure         |          |                     |                       |          |          |
| 6 $\pi$                                                               | 4        | 4                   | 4                     | 4        | 4        |
| 8 $\pi$                                                               | 1        | 2                   | 2                     | 3        | 4        |
| 12 $\pi$                                                              | 1        | 2                   | 2                     | 3        | 4        |

**Table S2** Summary of oscillation strengths, HOMO-LUMO gaps obtained from the UV-Vis spectroscopy, electrochemical studies and DFT calculations for the ring-fused porphyrins.

|                | Oscillator Strength                  |                                      |       | $\Delta(\text{HOMO} - \text{LUMO}), \text{eV}$ |                         |      |
|----------------|--------------------------------------|--------------------------------------|-------|------------------------------------------------|-------------------------|------|
|                | Soret                                | Q                                    | total | CV <sup>a</sup>                                | UV-Vis-NIR <sup>b</sup> | DFT  |
| ZnTPP          | 1.497<br>(389 – 444 nm) <sup>c</sup> | 0.123<br>(497 – 647 nm) <sup>c</sup> | 1.620 | 2.19                                           | 2.07                    | 2.86 |
| <b>1</b>       | 1.110<br>(430 – 538 nm) <sup>c</sup> | 0.103<br>(540 – 821 nm) <sup>c</sup> | 1.213 | 1.81                                           | 1.60                    | 2.41 |
| <b>2-cis</b>   | 0.884<br>(374 – 475 nm) <sup>c</sup> | 0.077<br>(621 – 851 nm) <sup>c</sup> | 0.961 | 1.73                                           | 1.56                    | 2.37 |
| <b>2-trans</b> | 1.149<br>(445 – 614 nm) <sup>c</sup> | 0.128<br>(615 – 967 nm) <sup>c</sup> | 1.277 | 1.45                                           | 1.39                    | 2.07 |
| <b>3</b>       | 0.568<br>(389 – 444 nm) <sup>c</sup> | 0.059<br>(389 – 444 nm) <sup>c</sup> | 0.627 | 1.42                                           | 1.30                    | 2.04 |
| <b>4</b>       | 0.499<br>(389 – 444 nm) <sup>c</sup> | 0.039<br>(389 – 444 nm) <sup>c</sup> | 0.538 | 1.32                                           | 1.21                    | 1.94 |

<sup>a</sup> Obtained from the difference between the first oxidation and first reduction potentials. <sup>b</sup> Obtained from the wavelength of the lowest absorption band. <sup>c</sup> The oscillator strength was calculated with the wavelength range indicated in the parenthesis.

**Table S3** TD-DFT results for low-energy  $\pi$ - $\pi^*$  states of the ring-fused porphyrin derivatives<sup>a</sup>

| compound       | wavelength, nm | oscillator strength | contribution (weight %) <sup>b</sup>   |
|----------------|----------------|---------------------|----------------------------------------|
| <b>1</b>       | 652.91         | 0.0347              | H→L (85), H-1→L+1 (10)                 |
|                | 476.70         | 0.0982              | H-1→L+1 (43), H-2→L (39), H→L+1 (6)    |
|                | 425.07         | 0.8041              | H-1→L (33), H→L+1 (28), H-2→L+1 (18)   |
| <b>2-cis</b>   | 674.00         | 0.0032              | H-1→L (55), H→L+1 (44)                 |
|                | 671.24         | 0.0169              | H→L (82), H-1→L+1 (16)                 |
|                | 567.23         | 0.0760              | H-1→L+1 (73), H-2→L (10), H→L (10)     |
| <b>2-trans</b> | 484.07         | 0.6550              | H→L+1 (43), H-1→L (33), H-3→L (18)     |
|                | 766.49         | 0.0471              | H→L (90), H-1→L+1 (6)                  |
|                | 480.73         | 0.2510              | H-1→L+1 (41), H-3→L (29), H-1→L (16)   |
|                | 443.79         | 0.5036              | H-4→L (39), H-4→L+1 (18), H→L+1 (14)   |
|                | 429.24         | 0.7010              | H-4→L (51), H-1→L (15)                 |
| <b>3</b>       | 812.01         | 0.0162              | H→L (92), H-1→L+1 (5)                  |
|                | 590.67         | 0.0310              | H-1→L+1 (66), H-2→L (10), H-3→L (9)    |
|                | 518.38         | 0.6563              | H→L+1 (33), H-2→L+2 (26), H-1→L (21)   |
|                | 407.17         | 0.4693              | H-5→L+1 (33), H-4→L (32), H-1→L+2 (13) |
| <b>4</b>       | 884.12         | 0.0061              | H→L (94)                               |
|                | 818.53         | 0.0056              | H-1→L (70), H→L+1 (29)                 |
|                | 534.38         | 0.9019              | H→L+1 (64), H-1→L (26)                 |
|                | 461.65         | 0.3157              | H-4→L (79), H-1→L+1 (8), H-2→L+2 (8)   |
|                | 402.97         | 0.5580              | H-6→L (67), H-3→L+2 (22)               |

<sup>a</sup> At the B3LYP/6-31G(d) level of theory. <sup>b</sup> H = HOMO, L = LUMO.

**Table S4** Crystallographic data for QFP derivatives

| compound                                          | <b>5</b> -py                        | <b>5</b> -dox                           | <b>8</b> -py                                      |
|---------------------------------------------------|-------------------------------------|-----------------------------------------|---------------------------------------------------|
| crystal system                                    | monoclinic                          | monoclinic                              | triclinic                                         |
| space group                                       | $P2_1/a$                            | $P2_1/a$                                | $P\bar{1}$                                        |
| $T$ , K                                           |                                     | 120                                     |                                                   |
| $C_{60}H_{52}N_4Zn \cdot C_5H_5N \cdot 2C_6H_5Cl$ | $C_{60}H_{52}N_4Zn \cdot C_4H_8O_2$ | $C_{48}H_{16}N_4F_{12}Zn \cdot C_5H_5N$ | $C_{60}H_{52}N_4Zn \cdot C_5H_5N \cdot 2C_6H_5Cl$ |
| FW                                                | 1198.62                             | 1130.72                                 | 1021.12                                           |
| $a$ , Å                                           | 17.737(2)                           | 19.126(2)                               | 16.724(13)                                        |
| $b$ , Å                                           | 18.295(3)                           | 17.2247(18)                             | 16.971(14)                                        |
| $c$ , Å                                           | 19.069(3)                           | 19.215 (2)                              | 20.045(16)                                        |
| $\alpha$ , °                                      | 90                                  | 90                                      | 107.054(11)                                       |
| $\beta$ , °                                       | 92.168(2)                           | 93.303(2)                               | 107.580(10)                                       |
| $\gamma$ , °                                      | 90                                  | 90                                      | 105.011(12)                                       |
| $V$ , Å <sup>3</sup>                              | 6183.5(15)                          | 6319.6(11)                              | 4793(7)                                           |
| $Z$                                               | 4                                   | 4                                       | 4                                                 |
| $\lambda$ , Å                                     |                                     | 0.71073 (Mo $K\alpha$ )                 |                                                   |
| $D_c$ , g cm <sup>-3</sup>                        | 1.288                               | 1.188                                   | 1.415                                             |
| reflns measured                                   | 34682                               | 33306                                   | 18428                                             |
| reflns unique                                     | 13927                               | 13857                                   | 12549                                             |
| $R1$ ( $I > 2\sigma(I)$ )                         | 0.0331                              | 0.1176                                  | 0.0835                                            |
| $wR2$ (all)                                       | 0.0916                              | 0.3252                                  | 0.2096                                            |
| GOF                                               | 1.038                               | 1.137                                   | 0.838                                             |

**Table S5** Cartesian coordinates of **1** calculated at the B3LYP/6-31G(d) level of theory

| -----                        |         |         |         |
|------------------------------|---------|---------|---------|
| Atom Coordinates (Angstroms) |         |         |         |
|                              | X       | Y       | Z       |
| -----                        |         |         |         |
| Zn                           | 0.1119  | -0.1019 | -0.0136 |
| N                            | 0.5805  | -2.1436 | -0.0287 |
| N                            | -1.8279 | -0.5313 | -0.0726 |
| N                            | -0.4433 | 1.8912  | 0.0458  |
| N                            | 2.0451  | 0.3817  | -0.0111 |
| C                            | 1.8568  | -2.6511 | 0.0105  |
| C                            | 1.8014  | -4.0996 | 0.0702  |
| H                            | 2.6586  | -4.7548 | 0.1258  |
| C                            | 0.4875  | -4.4517 | 0.0561  |
| H                            | 0.0817  | -5.4519 | 0.0967  |
| C                            | -0.2761 | -3.2282 | -0.0072 |
| C                            | -1.6651 | -3.0629 | -0.0302 |
| C                            | -2.2743 | -1.8012 | -0.0511 |
| C                            | -3.7031 | -1.8834 | -0.0029 |
| C                            | -4.1552 | -0.591  | 0.0179  |
| C                            | -2.9636 | 0.2587  | -0.031  |
| C                            | -2.9225 | 1.6587  | -0.0062 |
| C                            | -1.7181 | 2.409   | 0.0012  |
| C                            | -1.6493 | 3.8481  | -0.0896 |
| H                            | -2.499  | 4.5113  | -0.163  |
| C                            | -0.3285 | 4.1881  | -0.0969 |
| H                            | 0.0968  | 5.1782  | -0.1741 |
| C                            | 0.421   | 2.9578  | -0.0089 |
| C                            | 1.8294  | 2.8616  | -0.0202 |
| C                            | 2.5658  | 1.6624  | -0.014  |
| C                            | 4.0074  | 1.5874  | 0.0057  |
| H                            | 4.6752  | 2.4361  | 0.0193  |
| C                            | 4.3437  | 0.2679  | 0.0083  |
| H                            | 5.3358  | -0.1589 | 0.0123  |
| C                            | 3.1129  | -0.4867 | 0.0077  |
| C                            | 3.0429  | -1.8974 | 0.0185  |
| C                            | -2.8006 | -4.0353 | 0.0037  |
| C                            | -4.0394 | -3.3103 | 0.0252  |
| C                            | -5.2536 | -3.9778 | 0.0612  |
| H                            | -6.1872 | -3.4217 | 0.0783  |
| C                            | -5.2639 | -5.3823 | 0.0741  |
| H                            | -6.2109 | -5.9142 | 0.1023  |
| C                            | -4.0671 | -6.0922 | 0.049   |
| H                            | -4.0826 | -7.1788 | 0.0563  |
| C                            | -2.8305 | -5.4243 | 0.0129  |
| H                            | -1.9173 | -6.0087 | -0.0116 |
| C                            | -4.2191 | 2.4025  | 0.0053  |
| C                            | -4.5747 | 3.2106  | 1.0976  |
| H                            | -3.8961 | 3.2888  | 1.9422  |
| C                            | -5.7889 | 3.8972  | 1.1119  |

|   |         |         |         |
|---|---------|---------|---------|
| H | -6.049  | 4.5123  | 1.9694  |
| C | -6.669  | 3.7904  | 0.0332  |
| H | -7.6144 | 4.3263  | 0.044   |
| C | -6.327  | 2.9917  | -1.0593 |
| H | -7.0028 | 2.9072  | -1.9063 |
| C | -5.1136 | 2.303   | -1.0727 |
| H | -4.8454 | 1.6905  | -1.9289 |
| C | 2.6014  | 4.1459  | -0.051  |
| C | 3.3359  | 4.5165  | -1.1883 |
| H | 3.3375  | 3.8612  | -2.0549 |
| C | 4.0501  | 5.7149  | -1.2171 |
| H | 4.6087  | 5.9874  | -2.1088 |
| C | 4.0432  | 6.5628  | -0.108  |
| H | 4.6001  | 7.4957  | -0.1298 |
| C | 3.3161  | 6.2055  | 1.0291  |
| H | 3.3081  | 6.8576  | 1.8985  |
| C | 2.5999  | 5.0082  | 1.0565  |
| H | 2.0384  | 4.7302  | 1.9441  |
| C | 4.3397  | -2.6509 | 0.0438  |
| C | 4.7748  | -3.3635 | -1.0842 |
| H | 4.1644  | -3.3562 | -1.9831 |
| C | 5.9784  | -4.0697 | -1.0621 |
| H | 6.3006  | -4.6126 | -1.9468 |
| C | 6.7674  | -4.0751 | 0.0895  |
| H | 7.7046  | -4.625  | 0.1074  |
| C | 6.3456  | -3.3699 | 1.2183  |
| H | 6.9514  | -3.3722 | 2.1207  |
| C | 5.1422  | -2.6638 | 1.1952  |
| H | 4.8131  | -2.1207 | 2.0769  |
| H | -5.169  | -0.2209 | 0.0762  |

**Table S6** Cartesian coordinates of **2-cis** calculated at the B3LYP/6-31G(d) level of theory

| -----                        |         |         |         |
|------------------------------|---------|---------|---------|
| Atom Coordinates (Angstroms) |         |         |         |
|                              | X       | Y       | Z       |
| -----                        |         |         |         |
| Zn                           | 0.2453  | -0.0268 | 0       |
| N                            | 2.3983  | -0.0343 | 0       |
| N                            | 0.2022  | -0.0827 | -1.9435 |
| N                            | -1.8356 | 0.0532  | 0       |
| N                            | 0.2022  | -0.0827 | 1.9435  |
| C                            | 3.221   | -0.0178 | 1.1068  |
| C                            | 4.606   | 0.0148  | 0.68    |
| H                            | 5.4707  | 0.0356  | 1.327   |
| C                            | 4.606   | 0.0148  | -0.68   |
| H                            | 5.4707  | 0.0356  | -1.327  |
| C                            | 3.221   | -0.0178 | -1.1068 |
| C                            | 2.7041  | -0.0267 | -2.4072 |
| C                            | 1.3237  | -0.0477 | -2.6845 |
| C                            | 1.046   | 0.0094  | -4.0876 |
| C                            | -0.3198 | 0.0239  | -4.2057 |
| H                            | -0.9269 | 0.0859  | -5.0977 |
| C                            | -0.8527 | -0.0373 | -2.845  |
| C                            | -2.2005 | -0.0186 | -2.4581 |
| C                            | -2.6485 | -0.0104 | -1.1057 |
| C                            | -4.0227 | -0.1213 | -0.6837 |
| H                            | -4.8769 | -0.2139 | -1.3388 |
| C                            | -4.0227 | -0.1213 | 0.6837  |
| H                            | -4.8769 | -0.2139 | 1.3388  |
| C                            | -2.6485 | -0.0104 | 1.1057  |
| C                            | -2.2005 | -0.0186 | 2.4581  |
| C                            | -0.8527 | -0.0373 | 2.845   |
| C                            | -0.3198 | 0.0239  | 4.2057  |
| H                            | -0.9269 | 0.0859  | 5.0977  |
| C                            | 1.046   | 0.0094  | 4.0876  |
| C                            | 1.3237  | -0.0477 | 2.6845  |
| C                            | 2.7041  | -0.0267 | 2.4072  |
| C                            | 3.3558  | 0.0206  | -3.7515 |
| C                            | 2.3425  | 0.0467  | -4.7685 |
| C                            | 2.683   | 0.095   | -6.1122 |
| H                            | 1.9095  | 0.1155  | -6.8753 |
| C                            | 4.0386  | 0.1159  | -6.4754 |
| H                            | 4.3152  | 0.1531  | -7.5254 |
| C                            | 5.0274  | 0.0881  | -5.4953 |
| H                            | 6.075   | 0.1027  | -5.7839 |
| C                            | 4.6929  | 0.0405  | -4.1317 |
| H                            | 5.4893  | 0.0175  | -3.3961 |
| C                            | -3.237  | -0.0156 | -3.5349 |
| C                            | -4.1334 | 1.0578  | -3.6658 |
| H                            | -4.0632 | 1.8941  | -2.9763 |
| C                            | -5.0958 | 1.0637  | -4.6753 |

|   |         |         |         |
|---|---------|---------|---------|
| H | -5.7754 | 1.907   | -4.7655 |
| C | -5.1832 | -0.0055 | -5.5692 |
| H | -5.9346 | -0.0014 | -6.3542 |
| C | -4.3005 | -1.0801 | -5.4477 |
| H | -4.3653 | -1.9199 | -6.1344 |
| C | -3.3348 | -1.0845 | -4.4407 |
| H | -2.6556 | -1.9264 | -4.3421 |
| C | -3.237  | -0.0156 | 3.5349  |
| C | -3.3348 | -1.0845 | 4.4407  |
| H | -2.6556 | -1.9264 | 4.3421  |
| C | -4.3005 | -1.0801 | 5.4477  |
| H | -4.3653 | -1.9199 | 6.1344  |
| C | -5.1832 | -0.0055 | 5.5692  |
| H | -5.9346 | -0.0014 | 6.3542  |
| C | -5.0958 | 1.0637  | 4.6753  |
| H | -5.7754 | 1.907   | 4.7655  |
| C | -4.1334 | 1.0578  | 3.6658  |
| H | -4.0632 | 1.8941  | 2.9763  |
| C | 3.3558  | 0.0206  | 3.7515  |
| C | 2.3425  | 0.0467  | 4.7685  |
| C | 2.683   | 0.095   | 6.1122  |
| H | 1.9095  | 0.1155  | 6.8753  |
| C | 4.0386  | 0.1159  | 6.4754  |
| H | 4.3152  | 0.1531  | 7.5254  |
| C | 5.0274  | 0.0881  | 5.4953  |
| H | 6.075   | 0.1027  | 5.7839  |
| C | 4.6929  | 0.0405  | 4.1317  |
| H | 5.4893  | 0.0175  | 3.3961  |



**Table S7** Cartesian coordinates of **2-trans** calculated at the B3LYP/6-31G(d) level of theory

| Atom | Coordinates (Angstroms) |         |         |
|------|-------------------------|---------|---------|
|      | X                       | Y       | Z       |
| Zn   | 0                       | 0       | 0.0108  |
| N    | -1.4864                 | 1.5076  | -0.0119 |
| N    | 1.4311                  | 1.3147  | 0.0679  |
| N    | 1.4864                  | -1.5076 | -0.0119 |
| N    | -1.4311                 | -1.3147 | 0.0679  |
| C    | -2.8429                 | 1.2927  | 0.022   |
| C    | -3.5271                 | 2.5692  | 0.0744  |
| H    | -4.5978                 | 2.7032  | 0.1307  |
| C    | -2.5715                 | 3.5423  | 0.0583  |
| H    | -2.7328                 | 4.6097  | 0.1     |
| C    | -1.2948                 | 2.8735  | 0.0088  |
| C    | 0                       | 3.4185  | 0.003   |
| C    | 1.1642                  | 2.6378  | 0.0284  |
| C    | 2.3568                  | 3.4268  | -0.0077 |
| C    | 3.4022                  | 2.5406  | -0.0033 |
| C    | 2.8078                  | 1.2031  | 0.0465  |
| C    | 3.4869                  | -0.0289 | 0.0357  |
| C    | 2.8429                  | -1.2927 | 0.022   |
| C    | 3.5271                  | -2.5692 | 0.0744  |
| H    | 4.5978                  | -2.7032 | 0.1307  |
| C    | 2.5715                  | -3.5423 | 0.0583  |
| H    | 2.7328                  | -4.6097 | 0.1     |
| C    | 1.2948                  | -2.8735 | 0.0088  |
| C    | 0                       | -3.4185 | 0.003   |
| C    | -1.1642                 | -2.6378 | 0.0284  |
| C    | -2.3568                 | -3.4268 | -0.0077 |
| C    | -3.4022                 | -2.5406 | -0.0033 |
| H    | -4.4644                 | -2.7365 | -0.041  |
| C    | -2.8078                 | -1.2031 | 0.0465  |
| C    | -3.4869                 | 0.0289  | 0.0357  |
| C    | 0.4931                  | 4.8304  | -0.042  |
| C    | 1.9282                  | 4.8295  | -0.0493 |
| C    | 2.6395                  | 6.0177  | -0.0932 |
| H    | 3.7262                  | 6.0095  | -0.0993 |
| C    | 1.9386                  | 7.2352  | -0.1318 |
| H    | 2.4879                  | 8.1719  | -0.1659 |
| C    | 0.5474                  | 7.2438  | -0.1291 |
| H    | 0.0122                  | 8.1889  | -0.1619 |
| C    | -0.1831                 | 6.0427  | -0.0862 |
| H    | -1.2667                 | 6.0842  | -0.0929 |
| C    | 4.9824                  | 0.001   | 0.0351  |
| C    | 5.6887                  | 0.5305  | 1.1273  |
| H    | 5.1361                  | 0.9056  | 1.9841  |
| C    | 7.0835                  | 0.5651  | 1.1262  |
| H    | 7.6122                  | 0.9729  | 1.9837  |

|   |         |         |         |
|---|---------|---------|---------|
| C | 7.7972  | 0.0727  | 0.032   |
| H | 8.8835  | 0.1002  | 0.0308  |
| C | 7.1069  | -0.4552 | -1.0607 |
| H | 7.6538  | -0.8355 | -1.9195 |
| C | 5.7122  | -0.4914 | -1.059  |
| H | 5.1777  | -0.8938 | -1.9148 |
| C | -0.4931 | -4.8304 | -0.042  |
| C | -1.9282 | -4.8295 | -0.0493 |
| C | -2.6395 | -6.0177 | -0.0932 |
| H | -3.7262 | -6.0095 | -0.0993 |
| C | -1.9386 | -7.2352 | -0.1318 |
| H | -2.4879 | -8.1719 | -0.1659 |
| C | -0.5474 | -7.2438 | -0.1291 |
| H | -0.0122 | -8.1889 | -0.1619 |
| C | 0.1831  | -6.0427 | -0.0862 |
| H | 1.2667  | -6.0842 | -0.0929 |
| C | -4.9824 | -0.001  | 0.0351  |
| C | -5.7122 | 0.4914  | -1.059  |
| H | -5.1777 | 0.8938  | -1.9148 |
| C | -7.1069 | 0.4552  | -1.0607 |
| H | -7.6538 | 0.8355  | -1.9195 |
| C | -7.7972 | -0.0727 | 0.032   |
| H | -8.8835 | -0.1002 | 0.0308  |
| C | -7.0835 | -0.5651 | 1.1262  |
| H | -7.6122 | -0.9729 | 1.9837  |
| C | -5.6887 | -0.5305 | 1.1273  |
| H | -5.1361 | -0.9056 | 1.9841  |
| H | 4.4644  | 2.7365  | -0.041  |

**Table S8** Cartesian coordinates of **3** calculated at the B3LYP/6-31G(d) level of theory

| Atom | Coordinates (Angstroms) |         |         |
|------|-------------------------|---------|---------|
|      | X                       | Y       | Z       |
| Zn   | -0.0891                 | 0.1192  | 0.0057  |
| N    | 0.1728                  | 2.2937  | 0.0226  |
| N    | 1.7922                  | -0.0217 | 0.0425  |
| N    | -0.2127                 | -2.0059 | -0.0228 |
| N    | -1.9774                 | 0.243   | 0.0704  |
| C    | -0.8551                 | 3.2076  | 0.0102  |
| C    | -0.3041                 | 4.5492  | -0.0032 |
| H    | -0.8662                 | 5.4718  | -0.0134 |
| C    | 1.0542                  | 4.4237  | 0.0042  |
| H    | 1.7793                  | 5.2259  | -0.0009 |
| C    | 1.3536                  | 3.0069  | 0.0199  |
| C    | 2.6056                  | 2.3548  | 0.0291  |
| C    | 2.7075                  | 0.964   | 0.0366  |
| C    | 4.0677                  | 0.4651  | 0.0231  |
| C    | 3.9419                  | -0.9166 | 0.0152  |
| C    | 2.5167                  | -1.1629 | 0.0227  |
| C    | 2.1647                  | -2.507  | 0.0079  |
| C    | 0.8121                  | -2.9301 | 0.009   |
| C    | 0.2544                  | -4.2569 | 0.0687  |
| H    | 0.8124                  | -5.1818 | 0.1171  |
| C    | -1.1067                 | -4.1183 | 0.08    |
| H    | -1.8427                 | -4.9072 | 0.1415  |
| C    | -1.3943                 | -2.6996 | 0.0151  |
| C    | -2.6952                 | -2.1141 | 0.0235  |
| C    | -2.9624                 | -0.7297 | 0.0346  |
| C    | -4.2671                 | -0.0689 | -0.0245 |
| H    | -5.2134                 | -0.5881 | -0.0772 |
| C    | -4.0237                 | 1.2824  | -0.0182 |
| C    | -2.603                  | 1.4369  | 0.0323  |
| C    | -2.1982                 | 2.7875  | 0.0112  |
| C    | 4.0302                  | 2.8148  | 0.0189  |
| C    | 4.9072                  | 1.6694  | 0.0155  |
| C    | 6.2837                  | 1.838   | 0.0054  |
| H    | 6.9427                  | 0.9738  | 0.0025  |
| C    | 6.82                    | 3.1366  | -0.001  |
| H    | 7.8977                  | 3.2732  | -0.0087 |
| C    | 5.9781                  | 4.2441  | 0.003   |
| H    | 6.4008                  | 5.245   | -0.0015 |
| C    | 4.5799                  | 4.0886  | 0.0129  |
| H    | 3.948                   | 4.971   | 0.0164  |
| C    | 3.4827                  | -3.2205 | -0.0068 |
| C    | 4.5526                  | -2.2539 | -0.0025 |
| C    | 5.8739                  | -2.6695 | -0.017  |
| H    | 6.6799                  | -1.9406 | -0.014  |
| C    | 6.1642                  | -4.0459 | -0.0366 |

|   |         |         |         |
|---|---------|---------|---------|
| H | 7.1991  | -4.3763 | -0.0474 |
| C | 5.1357  | -4.9809 | -0.0438 |
| H | 5.3687  | -6.042  | -0.0609 |
| C | 3.788   | -4.5723 | -0.0303 |
| H | 3.0042  | -5.3227 | -0.0416 |
| C | -3.8706 | -3.0388 | 0.021   |
| C | -4.101  | -3.9078 | -1.0581 |
| H | -3.4168 | -3.899  | -1.9017 |
| C | -5.2022 | -4.7643 | -1.0612 |
| H | -5.3677 | -5.4242 | -1.9087 |
| C | -6.0911 | -4.7698 | 0.0154  |
| H | -6.9481 | -5.438  | 0.013   |
| C | -5.8721 | -3.9125 | 1.0951  |
| H | -6.5549 | -3.9144 | 1.9407  |
| C | -4.7727 | -3.0537 | 1.0974  |
| H | -4.5993 | -2.395  | 1.9436  |
| C | -3.4826 | 3.5536  | -0.0374 |
| C | -4.5865 | 2.6357  | -0.0585 |
| C | -5.8935 | 3.0951  | -0.1078 |
| H | -6.7232 | 2.3935  | -0.1246 |
| C | -6.1334 | 4.4784  | -0.136  |
| H | -7.1545 | 4.8477  | -0.1743 |
| C | -5.0689 | 5.375   | -0.1148 |
| H | -5.2618 | 6.4442  | -0.1362 |
| C | -3.7404 | 4.9191  | -0.0659 |
| H | -2.9355 | 5.6455  | -0.0506 |

**Table S9** Cartesian coordinates of **4** calculated at the B3LYP/6-31G(d) level of theory

| Atom | Coordinates (Angstroms) |         |         |
|------|-------------------------|---------|---------|
|      | X                       | Y       | Z       |
| Zn   | 0                       | 0       | 0       |
| N    | 0                       | -2.1899 | 0       |
| N    | 0                       | 0       | 1.8453  |
| N    | 0                       | 2.1899  | 0       |
| N    | 0                       | 0       | -1.8453 |
| C    | 0                       | -3.0024 | -1.1129 |
| C    | 0                       | -4.3852 | -0.6841 |
| H    | 0                       | -5.2535 | -1.3286 |
| C    | 0                       | -4.3852 | 0.6841  |
| H    | 0                       | -5.2535 | 1.3286  |
| C    | 0                       | -3.0024 | 1.1129  |
| C    | 0                       | -2.449  | 2.4209  |
| C    | 0                       | -1.0734 | 2.6587  |
| C    | 0                       | -0.6955 | 4.0557  |
| C    | 0                       | 0.6955  | 4.0557  |
| C    | 0                       | 1.0734  | 2.6587  |
| C    | 0                       | 2.449   | 2.4209  |
| C    | 0                       | 3.0024  | 1.1129  |
| C    | 0                       | 4.3852  | 0.6841  |
| H    | 0                       | 5.2535  | 1.3286  |
| C    | 0                       | 4.3852  | -0.6841 |
| H    | 0                       | 5.2535  | -1.3286 |
| C    | 0                       | 3.0024  | -1.1129 |
| C    | 0                       | 2.449   | -2.4209 |
| C    | 0                       | 1.0734  | -2.6587 |
| C    | 0                       | 0.6955  | -4.0557 |
| C    | 0                       | -0.6955 | -4.0557 |
| C    | 0                       | -1.0734 | -2.6587 |
| C    | 0                       | -2.449  | -2.4209 |
| C    | 0                       | -3.0348 | 3.801   |
| C    | 0                       | -1.9745 | 4.7806  |
| C    | 0                       | -2.2707 | 6.1348  |
| H    | 0                       | -1.4719 | 6.8716  |
| C    | 0                       | -3.6143 | 6.5483  |
| H    | 0                       | -3.85   | 7.6088  |
| C    | 0                       | -4.6386 | 5.608   |
| H    | 0                       | -5.6745 | 5.9358  |
| C    | 0                       | -4.3535 | 4.2296  |
| H    | 0                       | -5.1727 | 3.5179  |
| C    | 0                       | 3.0348  | 3.801   |
| C    | 0                       | 1.9745  | 4.7806  |
| C    | 0                       | 2.2707  | 6.1348  |
| H    | 0                       | 1.4719  | 6.8716  |
| C    | 0                       | 3.6143  | 6.5483  |
| H    | 0                       | 3.85    | 7.6088  |

|   |   |         |         |
|---|---|---------|---------|
| C | 0 | 4.6386  | 5.608   |
| H | 0 | 5.6745  | 5.9358  |
| C | 0 | 4.3535  | 4.2296  |
| H | 0 | 5.1727  | 3.5179  |
| C | 0 | 3.0348  | -3.801  |
| C | 0 | 1.9745  | -4.7806 |
| C | 0 | 2.2707  | -6.1348 |
| H | 0 | 1.4719  | -6.8716 |
| C | 0 | 3.6143  | -6.5483 |
| H | 0 | 3.85    | -7.6088 |
| C | 0 | 4.6386  | -5.608  |
| H | 0 | 5.6745  | -5.9358 |
| C | 0 | 4.3535  | -4.2296 |
| H | 0 | 5.1727  | -3.5179 |
| C | 0 | -3.0348 | -3.801  |
| C | 0 | -1.9745 | -4.7806 |
| C | 0 | -2.2707 | -6.1348 |
| H | 0 | -1.4719 | -6.8716 |
| C | 0 | -3.6143 | -6.5483 |
| H | 0 | -3.85   | -7.6088 |
| C | 0 | -4.6386 | -5.608  |
| H | 0 | -5.6745 | -5.9358 |
| C | 0 | -4.3535 | -4.2296 |
| H | 0 | -5.1727 | -3.5179 |

**Table S10** Cartesian coordinates of 1e<sup>-</sup>-oxidized **4** calculated at the B3LYP/6-31G(d) level of theory

| Atom | Coordinates (Angstroms) |         |   |
|------|-------------------------|---------|---|
|      | X                       | Y       | Z |
| Zn   | 0.0004                  | 0.0002  | 0 |
| N    | -1.9549                 | -0.9997 | 0 |
| N    | -0.845                  | 1.6511  | 0 |
| N    | 1.9549                  | 0.9997  | 0 |
| N    | 0.845                   | -1.6511 | 0 |
| C    | -2.1755                 | -2.3583 | 0 |
| C    | -3.5975                 | -2.6092 | 0 |
| H    | -4.0783                 | -3.5761 | 0 |
| C    | -4.2214                 | -1.3904 | 0 |
| H    | -5.287                  | -1.2153 | 0 |
| C    | -3.1863                 | -0.3835 | 0 |
| C    | -3.2876                 | 1.0384  | 0 |
| C    | -2.1661                 | 1.8849  | 0 |
| C    | -2.4682                 | 3.2973  | 0 |
| C    | -1.229                  | 3.9312  | 0 |
| C    | -0.2608                 | 2.8594  | 0 |
| C    | 1.0813                  | 3.2728  | 0 |
| C    | 2.1755                  | 2.3583  | 0 |
| C    | 3.5975                  | 2.6091  | 0 |
| H    | 4.0783                  | 3.576   | 0 |
| C    | 4.2214                  | 1.3904  | 0 |
| H    | 5.2869                  | 1.2152  | 0 |
| C    | 3.1862                  | 0.3834  | 0 |
| C    | 3.2876                  | -1.0385 | 0 |
| C    | 2.1659                  | -1.885  | 0 |
| C    | 2.4682                  | -3.2973 | 0 |
| C    | 1.2289                  | -3.9312 | 0 |
| C    | 0.2607                  | -2.8595 | 0 |
| C    | -1.0814                 | -3.2727 | 0 |
| C    | -4.4293                 | 1.9907  | 0 |
| C    | -3.9356                 | 3.3513  | 0 |
| C    | -4.8213                 | 4.4162  | 0 |
| H    | -4.4566                 | 5.4383  | 0 |
| C    | -6.2028                 | 4.1589  | 0 |
| H    | -6.9012                 | 4.9894  | 0 |
| C    | -6.684                  | 2.8509  | 0 |
| H    | -7.7538                 | 2.6703  | 0 |
| C    | -5.8011                 | 1.7606  | 0 |
| H    | -6.2008                 | 0.7533  | 0 |
| C    | 0.9782                  | 4.7559  | 0 |
| C    | -0.4136                 | 5.1527  | 0 |
| C    | -0.7574                 | 6.4945  | 0 |
| H    | -1.7994                 | 6.7981  | 0 |
| C    | 0.2607                  | 7.4634  | 0 |

|   |         |         |   |
|---|---------|---------|---|
| H | -0.0034 | 8.5159  | 0 |
| C | 1.6023  | 7.087   | 0 |
| H | 2.3757  | 7.848   | 0 |
| C | 1.9684  | 5.7324  | 0 |
| H | 3.0189  | 5.4661  | 0 |
| C | 4.4292  | -1.9908 | 0 |
| C | 3.9355  | -3.3513 | 0 |
| C | 4.8212  | -4.4162 | 0 |
| H | 4.4564  | -5.4384 | 0 |
| C | 6.2027  | -4.1589 | 0 |
| H | 6.9011  | -4.9895 | 0 |
| C | 6.6839  | -2.851  | 0 |
| H | 7.7537  | -2.6704 | 0 |
| C | 5.801   | -1.7606 | 0 |
| H | 6.2007  | -0.7534 | 0 |
| C | -0.9782 | -4.756  | 0 |
| C | 0.4135  | -5.1528 | 0 |
| C | 0.7572  | -6.4946 | 0 |
| H | 1.7992  | -6.7983 | 0 |
| C | -0.2608 | -7.4635 | 0 |
| H | 0.0032  | -8.516  | 0 |
| C | -1.6025 | -7.087  | 0 |
| H | -2.3759 | -7.8479 | 0 |
| C | -1.9684 | -5.7325 | 0 |
| H | -3.019  | -5.4662 | 0 |



**Table S11** Cartesian coordinates of 1e<sup>-</sup>-reduced **4** calculated at the B3LYP/6-31G(d) level of theory

| Atom | Coordinates (Angstroms) |         |         |
|------|-------------------------|---------|---------|
|      | X                       | Y       | Z       |
| Zn   | 0                       | 0       | 0       |
| N    | 0                       | 2.1981  | 0       |
| N    | 0                       | 0       | 1.8499  |
| N    | 0                       | -2.1981 | 0       |
| N    | 0                       | 0       | -1.8499 |
| C    | 0                       | 3.0095  | -1.1163 |
| C    | 0                       | 4.3953  | -0.6831 |
| H    | 0                       | 5.263   | -1.3284 |
| C    | 0                       | 4.3953  | 0.6831  |
| H    | 0                       | 5.263   | 1.3284  |
| C    | 0                       | 3.0095  | 1.1163  |
| C    | 0                       | 2.4658  | 2.4203  |
| C    | 0                       | 1.0753  | 2.6672  |
| C    | 0                       | 0.7078  | 4.0488  |
| C    | 0                       | -0.7078 | 4.0488  |
| C    | 0                       | -1.0753 | 2.6672  |
| C    | 0                       | -2.4658 | 2.4203  |
| C    | 0                       | -3.0095 | 1.1163  |
| C    | 0                       | -4.3953 | 0.6831  |
| H    | 0                       | -5.263  | 1.3284  |
| C    | 0                       | -4.3953 | -0.6831 |
| H    | 0                       | -5.263  | -1.3284 |
| C    | 0                       | -3.0095 | -1.1163 |
| C    | 0                       | -2.4658 | -2.4203 |
| C    | 0                       | -1.0753 | -2.6672 |
| C    | 0                       | -0.7078 | -4.0488 |
| C    | 0                       | 0.7078  | -4.0488 |
| C    | 0                       | 1.0753  | -2.6672 |
| C    | 0                       | 2.4658  | -2.4203 |
| C    | 0                       | 3.0485  | 3.7877  |
| C    | 0                       | 1.9788  | 4.7692  |
| C    | 0                       | 2.2842  | 6.1269  |
| H    | 0                       | 1.4851  | 6.8637  |
| C    | 0                       | 3.6243  | 6.5403  |
| H    | 0                       | 3.8594  | 7.6016  |
| C    | 0                       | 4.6544  | 5.6001  |
| H    | 0                       | 5.6899  | 5.9303  |
| C    | 0                       | 4.3686  | 4.2251  |
| H    | 0                       | 5.1871  | 3.5123  |
| C    | 0                       | -3.0485 | 3.7877  |
| C    | 0                       | -1.9788 | 4.7692  |
| C    | 0                       | -2.2842 | 6.1269  |
| H    | 0                       | -1.4851 | 6.8637  |
| C    | 0                       | -3.6243 | 6.5403  |

|   |   |         |         |
|---|---|---------|---------|
| H | 0 | -3.8594 | 7.6016  |
| C | 0 | -4.6544 | 5.6001  |
| H | 0 | -5.6899 | 5.9303  |
| C | 0 | -4.3686 | 4.2251  |
| H | 0 | -5.1871 | 3.5123  |
| C | 0 | -3.0485 | -3.7877 |
| C | 0 | -1.9788 | -4.7692 |
| C | 0 | -2.2842 | -6.1269 |
| H | 0 | -1.4851 | -6.8637 |
| C | 0 | -3.6243 | -6.5403 |
| H | 0 | -3.8594 | -7.6016 |
| C | 0 | -4.6544 | -5.6001 |
| H | 0 | -5.6899 | -5.9303 |
| C | 0 | -4.3686 | -4.2251 |
| H | 0 | -5.1871 | -3.5123 |
| C | 0 | 3.0485  | -3.7877 |
| C | 0 | 1.9788  | -4.7692 |
| C | 0 | 2.2842  | -6.1269 |
| H | 0 | 1.4851  | -6.8637 |
| C | 0 | 3.6243  | -6.5403 |
| H | 0 | 3.8594  | -7.6016 |
| C | 0 | 4.6544  | -5.6001 |
| H | 0 | 5.6899  | -5.9303 |
| C | 0 | 4.3686  | -4.2251 |
| H | 0 | 5.1871  | -3.5123 |
